1           The Sle1 Cell Wall Amidase Controls  
2           Daughter Cell Splitting, Cell Size, and  $\beta$ -  
3           Lactam Resistance in Community  
4           Acquired Methicillin Resistant  
5           *Staphylococcus aureus* USA300  
6

7           **Ida Thalsø-Madsen<sup>1</sup>‡, Fernando Ruiz Torrubia<sup>1</sup>‡, Lijuan Xu<sup>1</sup>, Andreas**  
8           **Petersen<sup>2</sup>, Camilla Jensen<sup>1</sup>, and Dorte Frees<sup>1\*</sup>**

9           <sup>1</sup>Department of Veterinary and Animal Sciences, University of Copenhagen,  
10           Copenhagen, Denmark; <sup>2</sup> Statens Serum Institut,  
11           Copenhagen, Denmark  
12  
13

14           ‡ These two authors contributed equally to the presented work

15           \* Corresponding author. Mailing address: Department of Veterinary Disease  
16           Biology, University of Copenhagen, Stigbøjlen 4, DK-1870 Frederiksberg C,  
17           Denmark. E-mail: [df@sund.ku.dk](mailto:df@sund.ku.dk); Tel: (+45) 3533 2719.  
18

19           **Running title: Sle1 is essential for  $\beta$ -Lactam Resistance in CA-MRSA**

20 **Summary**

21 Most clinically relevant methicillin resistant *Staphylococcus aureus* (MRSA) strains have  
22 become resistant to  $\beta$ -lactams antibiotics through horizontal acquisition of the *mecA*  
23 gene encoding PBP2a, a peptidoglycan transpeptidase with low affinity for  $\beta$ -lactams.  
24 The level of resistance conferred by *mecA* is, however, strain dependent and the  
25 mechanisms underlying this phenomenon remain poorly understood. We here show  
26 that  $\beta$ -lactam resistance correlates to expression of the Sle1 cell wall amidase in the fast  
27 spreading and highly virulent community-acquired MRSA USA300 clone. Sle1 is a  
28 substrate of the ClpXP protease, and while the high Sle1 levels in cells lacking ClpXP  
29 activity confer  $\beta$ -lactam hyper-resistance, USA300 cells lacking Sle1 are as sensitive to  $\beta$ -  
30 lactams as cells lacking *mecA*. This finding prompted us to assess the cellular roles of  
31 Sle1 in more detail, and we demonstrate that high Sle1 levels accelerate the onset of  
32 daughter cells splitting and decrease cell size. Vice versa, oxacillin decreases the Sle1  
33 level, and imposes a cell-separation defect that is antagonized by high Sle1 levels,  
34 suggesting that high Sle1 levels increase tolerance to oxacillin by promoting cell  
35 separation. In contrast, increased oxacillin sensitivity of *sle1* cells appears linked to a  
36 synthetic lethal effect on septum synthesis. In conclusion, this study demonstrates  
37 that Sle1 is a key factor in resistance to  $\beta$ -lactam antibiotics in the JE2 USA300 model  
38 strain, and that PBP2a is required for expression of Sle1 in JE2 cells exposed to oxacillin.

39

## 40 **Importance**

41 The bacterium *Staphylococcus aureus* is a major cause of human disease, and the global  
42 spread of *S. aureus* resistant to  $\beta$ -lactam antibiotics (MRSA) has made treatment  
43 increasingly difficult.  $\beta$ -lactams interfere with cross-linking of the bacterial cell wall,  
44 however, the killing mechanism of this important class of antibiotics is still not fully  
45 understood. Here we provide novel insight into this topic by showing that  $\beta$ -lactam  
46 resistance is controlled by the Sle1 cell wall amidase in the fast spreading and highly  
47 virulent MRSA USA300 clone. We show that Sle1 high levels accelerate the onset of  
48 daughter cells splitting and decrease cell size. Vice versa, oxacillin decreases the Sle1  
49 level, and imposes a cell-separation defect that is antagonized Sle1. The key finding that  
50 resistance to  $\beta$ -lactams correlates positively to expression of Sle1 indicates that, in *S.*  
51 *aureus*, the detrimental effects of  $\beta$ -lactam antibiotics are linked to inhibition of  
52 daughter cells splitting.

53

## 54 **Introduction**

55 The commensal bacterium *Staphylococcus aureus* that is colonizing the nasal cavity of  
56 about one third of the human population is a leading cause of bacterial infections with  
57 disease manifestations ranging from superficial skin infections to life-threatening  
58 invasive diseases (1). Historically,  $\beta$ -lactam antibiotics have been the agents of choice for  
59 the treatment of staphylococcal infections. However, effective treatment of these  
60 infections is hampered by the rapid spread of methicillin resistant *S. aureus* (MRSA) that  
61 are resistant to virtually all members of the class of  $\beta$ -lactam antibiotics (1,2). The  
62 emergence of community acquired MRSA (CA-MRSA) has dramatically increased the  
63 global burden of *S. aureus* infections, and the CA-MRSA clone USA300 is currently the  
64 most frequent cause of purulent skin infections in emergency departments in the United  
65 States (2,3). MRSA strains have acquired resistance to  $\beta$ -lactam antibiotics through  
66 horizontal acquisition of the *mecA* gene encoding PBP2a, an alternative transpeptidase  
67 with low affinity for most  $\beta$ -lactams. Hence, PBP2a is capable of performing the critical  
68 cross-linking of peptidoglycan strands when the native penicillin-binding proteins (PBPs)  
69 are inhibited by the irreversible binding of  $\beta$ -lactams to the active site (1). Clinically,  
70 MRSA isolates exhibit highly variable levels of resistance and specifically USA300 strains  
71 exhibit a relatively low level of resistance compared to other MRSA strains (4,5). The  
72 molecular mechanisms underlying the strain dependent resistance to  $\beta$ -lactams remain  
73 poorly understood, but the lack of correlation between resistance level and the level of  
74 PBP2a expression, suggests that factors other than PBP2a are involved (6–9). One such



75 factor is PBP4 that is required for  $\beta$ -lactam resistance in the CA-MRSA strains MW2 and  
76 USA300, but not in the highly resistant hospital-acquired-MRSA strain COL (4,10).  
77 The highly conserved cytoplasmic ClpXP protease is composed of separately encoded  
78 proteolytic subunits (ClpP), and ATPase units (ClpX), where ClpX serves to specifically  
79 recognize, unfold, and translocate substrates into the ClpP proteolytic chamber for  
80 degradation (11). Interestingly, inactivation of each of the components of the ClpXP  
81 protease substantially increased the  $\beta$ -lactam resistance level of the CA-MRSA USA300  
82 model strain JE2 without changing the level of PBP2a, or, the muropeptide profiles of  
83 the cell wall, and the mechanism by which ClpXP proteolytic activity modulates  $\beta$ -lactam  
84 resistance remained unexplained (5). In *S. aureus*, only a few ClpXP substrates, such as  
85 the essential transcriptional regulator, Spx, and the cell wall amidase Sle1, have been  
86 identified (12-14). Here we report that the highly increased  $\beta$ -lactam resistance  
87 displayed by the USA300 cells lacking ClpXP activity is completely lost upon inactivation  
88 of Sle1, suggesting that high Sle1 levels are causing the increased  $\beta$ -lactam resistance of  
89 *clpX* or *clpP* mutants. Conversely, inactivation of *sle1* rendered USA300 wild-type cells  
90 hyper-sensitive to  $\beta$ -lactam antibiotics. These results are surprising, as the activity of cell  
91 wall hydrolases is typically associated with cell lysis following  $\beta$ -lactam treatment, not  
92 with promoting survival (15-18). The finding that Sle1 modulates the resistance level of  
93 USA300 JE2, prompted us to assess the role of the Sle1 cell wall amidase in *S. aureus* cell  
94 division in more detail. Super resolution microscopy revealed that high Sle1 levels  
95 accelerate the onset of daughter cell separation starting from the peripheral wall  
96 resulting in cells of reduced size. Vice versa, oxacillin imposes a cell-separation defect

97 that is rescued by high Sle1 activity, suggesting that high Sle1 activity enhances  
98 tolerance to oxacillin by promoting daughter cell splitting. We further show that  
99 expression of Sle1 is correlated to the transpeptidase activity of PBPs, and that PBP2a is  
100 required for continued Sle1 expression in cells exposed to oxacillin. Finally, we show the  
101 increased oxacillin sensitivity of *sle1* cells seems to be linked to a synergistic lethal effect  
102 on septum synthesis.

103 **Results**

104 *Disruption of the ClpP recognition tripeptide in ClpX confers  $\beta$ -lactam hyper-resistance in*

105 *USA300*

106 We previously showed that deletion of either the *clpX* or the *clpP* gene resulted in a  
107 substantial increase in  $\beta$ -lactam resistance of the clinically important CA-MRSA clone  
108 USA300, suggesting that  $\beta$ -lactam resistance can be modulated via pathways depending  
109 on the activity of the ClpXP protease (5). In *S. aureus*, ClpP can associate with an  
110 alternative substrate recognition factor, ClpC (19), while ClpX independently of ClpP  
111 functions as a molecular chaperone (20). To confirm that ClpP and ClpX controls  $\beta$ -  
112 lactam resistance via formation of the ClpXP protease, we investigated if  $\beta$ -lactam  
113 resistance is increased in cells that retains ClpX chaperone and ClpCP activity but cannot  
114 form the ClpXP protease due to a single amino acid substitution in the ClpP recognition  
115 IGF motif of ClpX (21). Indeed, introduction of an I<sub>265</sub>E substitution in the IGF tripeptide  
116 of ClpX increased the MICs of JE2 against all tested  $\beta$ -lactams confirming that  
117 inactivation of the ClpXP protease enhances the  $\beta$ -lactam resistance level of the  
118 clinically important CA-MRSA clone USA300 (Table 1). Specifically, expression of the  
119 ClpX<sub>I265E</sub> variant increased the MICs of oxacillin, cefotaxime, and meropenem  
120 approximately 8-fold, while causing a minor 2-fold increase in the MICs of imipenem and  
121 cefoxitin. We conclude that ClpXP contributes to cellular processes that determine the  
122  $\beta$ -lactam resistance level of JE2.

123

124 *Sle1 is conferring increased  $\beta$ -lactam resistance in JE2 lacking ClpXP activity*

125 In *S. aureus*, the cell wall amidase Sle1 is a substrate of the ClpXP protease, and  
126 consequently the cellular levels of Sle1 are elevated in cells lacking ClpXP activity (21).  
127 To investigate if the high Sle1 levels play a role in the hyper-resistant phenotype of cells  
128 expressing the ClpX<sub>I265E</sub> variant, we next inactivated *sle1* in JE2 wild-type and *clpX*<sub>I265E</sub>  
129 cells and assessed the impact on  $\beta$ -lactam MICs. Interestingly, inactivation of *sle1* not  
130 only abrogated the increased resistance of cells lacking ClpXP protease activity, but  
131 decreased MICs below the wild-type level (Table 1). Similarly, inactivation of *sle1* in the  
132 JE2 wild-type decreased MICs of all  $\beta$ -lactams except imipenem, and rendered JE2  
133 hyper-sensitive to oxacillin, with the oxacillin MIC decreasing from 32  $\mu\text{g ml}^{-1}$  in wild-  
134 type cells to 0.5  $\mu\text{g ml}^{-1}$  in *sle1* cells. In fact, inactivation of *sle1* rendered cells as  
135 sensitive to oxacillin as did inactivation of *mecA* (Table 1). JE2*mecA* cells expressing the  
136 ClpX<sub>I265E</sub> variant were as sensitive to  $\beta$ -lactams, as were JE2*mecA* expressing wild-type  
137 ClpX, demonstrating that high Sle1 levels only confer resistance to cells expressing  
138 PBP2a. This result is consistent with previous results showing that neither deletion of  
139 *clpP* nor deletion of *clpX* alter the MICs of  $\beta$ -lactams in methicillin sensitive *S. aureus*  
140 (MSSA) strains (5), and in agreement with this finding, introduction of the *sle1*- and  
141 *clpX*<sub>I265E</sub> mutations into the two MSSA strains, SA564 (clinical isolate) and 8325-4 (lab-  
142 strain) had only a slight impact on MICs (Table 1): inactivation of *sle1* reduced MICs of  
143 most  $\beta$ -lactams about 2 fold, while expression of the ClpX<sub>I265E</sub> variant did not impact  $\beta$ -  
144 lactam MICs in the MSSA strains (Table 1).  
145 Standard MIC-assays prescribe the use of stationary cells and we finally asked, if Sle1  
146 levels also impact the ability of exponentially growing JE2 cells to form colonies in the

147 presence of different concentrations of  $\beta$ -lactams. Consistent with the MIC tests, the  
148 spot assay showed that JE2clpX<sub>I265E</sub> cells were capable of forming colonies in the  
149 presence of antibiotic concentrations that inhibited growth of JE2 wild-type cells for all  
150 tested  $\beta$ -lactams (Fig. S1). Furthermore, inactivation of *sle1* rendered both wild-type and  
151 *clpX<sub>I265E</sub>* cells hyper-sensitive to all tested  $\beta$ -lactams (Fig. S1).

152 We conclude that in the JE2 MRSA strain,  $\beta$ -Lactam resistance depends on the Sle1 cell  
153 wall amidase, and that ClpXP contributes negatively to  $\beta$ -lactam tolerance via  
154 degradation of Sle1.

155

156 *Population analysis profiles reveal that sle1 cells become homogenously hyper-sensitive*  
157 *to oxacillin*

158 Similar to other CA-MRSA strains, JE2 displays heterogeneity with respect to  $\beta$ -lactam  
159 susceptibility, meaning that the majority of cells exhibit a low level of antibiotic  
160 resistance, while a minority of cells is highly resistant (1,5). In order to determine if  
161 inactivation of Sle1 or ClpXP alters the hetero-resistant phenotype of the JE2 strain, a  
162 population analysis profile (PAP) was performed. In the PAP analysis, we chose to focus  
163 on oxacillin and cefoxitin, as these two compounds represent  $\beta$ -lactams whose MICs  
164 were highly and marginally effected, respectively, by expression of the ClpX<sub>I265E</sub> variant.  
165 As expected, the PAP analysis resulted in a typical heterogeneous profile for the JE2  
166 wild-type strain with the majority of cells being killed by low concentrations of either  
167 oxacillin or cefoxitin, while a small subpopulation was capable of growing at much  
168 higher concentrations of antibiotics (Fig. 1). Expression of the ClpX<sub>I265E</sub> variant not only

169 increased the fraction of JE2 cells able to grow in the presence of medium high levels  
170 (16-32  $\mu\text{g ml}^{-1}$ ) of antibiotics by 4 logs, but also enabled the most resistant  
171 subpopulation to grow at even higher concentrations of antibiotics, Fig. 1. On the  
172 contrary, inactivation of *sle1* transformed both the JE2 wild-type and JE2clpX<sub>I265E</sub> into a  
173 homogeneously sensitive strain with all cells in the population being inhibited by very  
174 low concentrations of antibiotics, Fig. 1.

175

176 *Inactivation of Sle1 delays the onset of daughter cell splitting, while high Sle1 levels*  
177 *accelerate the onset of daughter cell separation*

178 Based on the finding that deletion of *sle1* induced formation of cell clusters it was  
179 proposed that Sle1 is involved in separation of *S. aureus* daughter cells (14). The  
180 interesting finding that Sle1 activity impacts resistance to  $\beta$ -lactam antibiotics prompted  
181 us to assess the role of Sle1 in *S. aureus* cell division in more detail using Super-  
182 Resolution Structured Illumination Microscopy (SR-SIM). Prior to SR-SIM, cells were  
183 stained with the membrane stain, Nile Red, and the cell wall stain fluorescent wheat  
184 germ agglutinin (WGA-488) that is too big to penetrate into cells and therefore only  
185 labels cell wall exposed to the exterior milieu during the staining period (22,23). To  
186 visualize regions of new peptidoglycan insertion, cells were additionally stained with the  
187 blue fluorescent D-amino acid, hydroxycoumarin-amino-D-alanine (HADA). To  
188 investigate the impact of Sle1 on the *S. aureus* cell cycle, we first assigned wild-type and  
189 mutant cells to different phases based on the state of septum ingrowth (22): newly  
190 separated daughter cells that have not initiated septum formation were assigned to

191 phase 1, cells in the process of synthesizing division septa were assigned to phase 2,  
192 while cells displaying a closed septum were assigned to phase 3. As depicted in Fig. 2A  
193 inactivation of *sle1* significantly increased the fraction of phase 3 cells (P=0.04), while  
194 conversely, the fraction of phase 3 cells was significantly reduced in *clpX<sub>1265E</sub>* cells (P =  
195 0.004), however, only if cells express Sle1. As the percentage of cells observed in each  
196 growth phase should be proportional to the fraction of the cell cycle spent in that stage,  
197 this finding indicates that separation of fully divided daughter cells is delayed in the  
198 absence of Sle1, while *clpX<sub>1265E</sub>* cells spend less time in phase 3. In support here off,  
199 splitting of the HADA-stained septal wall was only observed in 7% of *sle1* cells, as  
200 compared to 31% of wild-type cells, and 69% of cells expressing the ClpX<sub>1265E</sub> variant –  
201 Fig. 3A-B, and D. In conclusion, daughter cell separation is delayed in the absence of  
202 Sle1, while high levels of Sle1 seem to accelerate the onset of *S. aureus* daughter cell  
203 splitting.

204

#### 205 *Sle1 controls cell size*

206 Characterization of the *S. aureus* cell cycle revealed that *S. aureus* cells are capable of  
207 elongating, and that elongation mainly occurs in phase 1 and phase 3 (22,23). After  
208 establishing that the level of Sle1 impacts the time cells spend in phase 3, we  
209 determined if Sle1 activity impacts the cell size. Indeed, the estimation of cell size  
210 demonstrated that *clpX<sub>1265E</sub>* cells are significantly smaller than wild-type cells (P <  
211 0.0001), whereas *clpX<sub>1265E</sub>, sle1* cells are of similar size as wild-type cells (Fig. 4A).  
212 Inactivation of *sle1* in wild-type cells resulted in cells being slightly, but significantly,

213 larger than wild-type cells ( $P < 0.0001$ ), Fig. 4A. We conclude that high levels of the Sle1  
214 cell wall amidase leads to a decrease in cell size, while inactivation of Sle1 increases the  
215 cell size.

216

217 *Scanning electron microscopy indicates that Sle1 contributes to the formation of*  
218 *perforations in the peripheral septal ring prior to popping*

219 At the time of cell separation, *S. aureus* daughter cells are connected only at the edge of  
220 the septum by a peripheral ring (23,24). Resolution of this peripheral wall by mechanical  
221 crack propagation results in ultrafast splitting of daughter cells in a process designated  
222 “popping” (23). Scanning electron microscopy (SEM) have revealed that popping is  
223 preceded by the presence of perforation holes around the bacterial circumference  
224 coincident with the outer edge of the division septum, and it was speculated that  
225 autolysins are involved in formation of these holes (23). To examine if Sle1 is the  
226 autolysin responsible for creating perforation holes along the septal ring, SEM was used  
227 to image the cell surface of wild-type and *clpX*<sub>I265E</sub> cells, as well as the surface of the  
228 corresponding *sle1*-negative strains (Fig. 5). In agreement with published data, small  
229 holes are visible at mid-cells in a small fraction of wild-type cells (Fig. 5). Typically,  
230 perforation holes were apparent on ellipsoid cells displaying a slight invagination at mid-  
231 cell, supporting that these cells are in the process of dividing. In support of Sle1 being  
232 involved in generating these perforation holes, inactivation of *sle1* in both wild-type and  
233 *clpX*<sub>I265E</sub> cells rendered the cell wall at mid-cell appear more smooth and less perforated  
234 (Fig. 5). On the other hand, the fraction of cells displaying cracks at mid-cell appeared



235 substantially increased in cells expressing the ClpX<sub>I265E</sub> variant, and most *clpX*<sub>I265E</sub> cells  
236 captured in SEM images are in different stages of cell-separation, Fig. 5. These  
237 phenotypes of the *clpX*<sub>I265E</sub> cells disappeared upon inactivation of Sle1. We conclude  
238 that the fraction of cells displaying perforations at mid-cells correlates to the level of  
239 Sle1 expression indicating that the Sle1 cell wall amidase contributes to degradation of  
240 the cell wall in the peripheral ring of the division septum prior to popping.

241

242 *Oxacillin treatment impedes separation of daughter cells and interferes with septum*  
243 *formation in cells devoid of Sle1*

244 We now sought an answer to why  $\beta$ -lactam resistance correlates to expression of Sle1 in  
245 the JE2 background. Based on the finding that Sle1 is required for fast separation of *S.*  
246 *aureus* daughter cells, we first hypothesized that  $\beta$ -lactams impose a cell-separation  
247 defect that, while being rescued by high Sle1 activity, is lethal to cells lacking Sle1  
248 activity. To test this hypothesis JE2 wild-type, *sle1* and *clpX*<sub>I265E</sub> cells were exposed to  
249 1.25  $\mu\text{g ml}^{-1}$  oxacillin (1/4 MIC of cells devoid of Sle1 activity) for 20 min before cells  
250 were stained with Nile Red, WGA, and HADA and imaged by SR-SIM. Consistent with the  
251 idea that oxacillin impedes splitting of daughter cells, the fraction of wild-type cells  
252 displaying splitting of the HADA stained septum was significantly reduced from 31% to  
253 less than 10% ( $P < 0.0001$ ) upon exposure to oxacillin (Fig. 3C and E). Likewise, the  
254 fraction of wild-type cells divided by a closed septum (phase 3 cells), and the size of  
255 wild-type cells increased significantly following oxacillin exposure (Fig. 2 and Fig. 4,  
256 respectively). Moreover, high Sle1 levels seems to antagonize the cell separation defect

257 conferred by oxacillin, as significantly more *clpX<sub>1265E</sub>* than wild-type were capable of  
258 splitting in the presence of oxacillin (Fig. 2 and Fig. 3). Taken together these data  
259 support that oxacillin confers a cell separation defect that is rescued by high Sle1  
260 activity. On the other hand, oxacillin was expected to exacerbate the cell separation  
261 defects of cells devoid of Sle1, however, oxacillin rather diminished the fraction of *sle1*  
262 cells in phase 3 (Fig. 2), and very few oxacillin treated *sle1* cells displayed a closed HADA-  
263 stained septum (Fig. 3). In fact, the HADA signal was weak, or even absent in the  
264 majority of *sle1* cells exposed to oxacillin (Fig. 3; Fig. S2). Strikingly, the ability of cells to  
265 incorporate HADA in the presence of oxacillin correlated with Sle1 expression, as  
266 oxacillin also reduced the HADA signal in wild-type cells, while the intensity of the HADA  
267 signal in JE2*clpX<sub>1265E</sub>* was similar +/- oxacillin exposure, and did not change, even if cells  
268 were treated with higher oxacillin concentrations (Fig. 3; Fig. S2). Therefore, oxacillin  
269 seems also to impose a septum synthesis defect that is exacerbated in the absence of  
270 Sle1. In support here off, SR-SIM images revealed abnormal septal ingrowths in 75% of  
271 *sle1* cells exposed to oxacillin (Fig. 6; Fig. S2). To study the morphological changes  
272 induced by oxacillin in cells lacking Sle1 in more detail, cells exposed to oxacillin for 20  
273 min were additionally imaged with transmission electron microscopy (TEM). Both SR-  
274 SIM and TEM confirmed severe abnormalities in septal ingrowths in oxacillin treated  
275 *sle1* cells, with septa being devoid of the electron-dense septal mid-zone previously  
276 designated “the splitting line” (25) (Fig. 6C, i-iv; Fig. S2, and Fig. S3), septa protruding  
277 asymmetrically inwards (Fig. 6C, iii-iv), and displaying a characteristic “curvy”  
278 morphology (Fig. 6C, ii-iv). Both TEM and SR-SIM images also revealed that exposure to

279 oxacillin resulted in lysis of a small fraction of *sle1* cells, and that lyzed *sle1* cells were  
280 typically observed in daughter cell pairs, where the lyzed cell is attached to a living cell  
281 (Fig. 6C, iv). Similar, but less severe changes in the septum morphology were observed  
282 in wild-type exposed to the same concentration of oxacillin (Fig. 6A; Fig. S2, and Fig. S3).  
283 In summary, we found that while high levels of Sle1 seem to enhance tolerance to  
284 oxacillin by antagonizing an oxacillin induced cell separation defect, the increased  
285 oxacillin sensitivity of *sle1* cells seems to be linked to a synthetic lethal effect on  
286 septum synthesis.

287

#### 288 *Expression of Sle1 is reduced in cells exposed to oxacillin*

289 The two major cell wall hydrolases involved in *S. aureus* daughter cell splitting are Sle1  
290 and Atl (14,26,27). To examine if oxacillin interferes with splitting of JE2 daughter cells  
291 by reducing expression of these enzymes, murein hydrolase activity was determined in  
292 cell wall extracts derived from cells grown in the absence or presence of oxacillin using  
293 standard zymography. The resulting murein hydrolase profiles showed multiple bands  
294 that were apparently AtlA-related, since they disappear in extracts from an  $\Delta atl$  mutant  
295 (Fig. 7A; Fig. S4A). Sle1 is a 32 kDa protein comprised of an N terminal cell wall binding  
296 domain and a C terminal catalytic domain with N-acetyl muramyl-l-alanine amidase  
297 activity (14). In the zymographs, the activity of the Sle1 autolysin is also clearly visible,  
298 and as expected cell wall extracts derived from JE2clpX<sub>I265E</sub> cells displayed higher Sle1  
299 activity than wild-type cells both in the absence or presence of oxacillin (Fig. 7A).  
300 Interestingly, only the intensity of the Sle1 band was diminished in cell wall extracts

301 derived from JE2 cells exposed to oxacillin (Fig. 7A). These findings indicate that Sle1  
302 expression is down-regulated, or, alternatively that export of Sle1 to the cell wall is  
303 reduced in JE2 exposed to oxacillin. To distinguish between these two possibilities, we  
304 additionally determined the Sle1 level in cell wall extracts and in whole cells by Western  
305 blotting (Fig. 7B; Fig. S4B). In agreement with previous findings, both the non-exported  
306 and the exported form of Sle1 accumulate in JE2 cells expressing the ClpX<sub>I265E</sub> variant  
307 [21]. In wild-type cells, however, the non-exported Sle1 was neither detected in cells  
308 grown in the absence, nor in cells grown in the presence of oxacillin (Fig. S4B), and a  
309 similar 2-fold reduction in the Sle1 level were observed in cell wall extracts and in  
310 extracts from whole cells (Fig. 7B; Fig. S4B). Hence, oxacillin seems to reduce expression,  
311 not export of Sle1.

312

313 *Sle1 levels are reduced 10-fold in JE2mecA cells exposed to oxacillin*

314 The finding that exposure to oxacillin reduced levels of Sle1 in JE2 cells shows that  
315 expression of Sle1 is positively coupled to the transpeptidase activity of PBPs. Oxacillin  
316 blocks the transpeptidase domain of native PBPs and, therefore, we predicted that  
317 expression of Sle1 depends on the transpeptidase activity of PBP2a in oxacillin-treated  
318 JE2 cells. To test this hypothesis, we determined the levels of Sle1 in JE2mecA cells  
319 grown in the absence or presence of oxacillin. Interestingly, this analysis revealed that,  
320 whilst the intensities of Sle1 bands were similar in extracts from wild-type and *mecA*  
321 cells grown in the absence of oxacillin, Sle1 was barely detectable in *mecA* cells exposed  
322 to oxacillin (Fig. 7). Taken together, these results lend support to the idea that Sle1

323 expression is coupled to activity of the transpeptidase domain of PBPs, and that Sle1  
324 expression becomes dependent on PBP2a activity in JE2 cells exposed to oxacillin.  
325 Finally we noted that while oxacillin did not impact intensities of the different Atl bands  
326 in JE2 wild-type cells, the intensities of two Atl bands were diminished in oxacillin  
327 exposed JE2 cells not expressing Sle1 or PBP2A (Fig. 7A, asterisks). The bifunctional Atl  
328 murein hydrolase is produced as a precursor protein (Pro-Atl) that undergoes  
329 proteolytic cleavage to yield two catalytically active proteins, an amidase (AM) and a  
330 glucosaminidase (GL) (27). The 113 kDa band represents an intermediary cleavage  
331 product , while the 62 kDa band reflects activity of the fully cleaved amidase (28).  
332 Therefore, PBP2a and Sle1 may additionally have a role in Atl processing in oxacillin  
333 exposed JE2 cells.

334 **Discussion**

335  $\beta$ -lactam antibiotics are the most frequently prescribed antibiotics world-wide,  
336 however, the mechanism by which the binding of  $\beta$ -lactams to their PBP targets causes  
337 death and lysis of bacteria is not completely understood (1, 29,30). In at least some  
338 bacteria, the killing mechanism of  $\beta$ -lactams involves unsynchronized activation of  
339 peptidoglycan hydrolases (15-18). Contradictive to this model, we here show that the  
340 activity of the Sle1 cell wall amidase is crucial for PBP2a mediated resistance to  $\beta$ -  
341 lactams in the JE2 CA-MRSA model strain, and that elevated levels of Sle1 confers  
342 increased resistance to  $\beta$ -lactams, however, only if JE2 expresses PBP2a. The key finding  
343 that resistance to  $\beta$ -lactams correlates positively to expression of Sle1 indicates that, in  
344 *S. aureus*, the detrimental effects of  $\beta$ -lactam antibiotics are linked to inhibition, rather  
345 than to activation, of peptidoglycan hydrolase activity.

346 Sle1 was proposed to function in *S. aureus* cell division (14), and with the recent  
347 advances in SR-SIM we now examined the role of Sle1 in this fundamental process in  
348 more detail using cells either lacking or over-producing Sle1. To divide, *S. aureus* builds  
349 a septal cross wall generating two hemispherical daughter cells that, at the time of cell  
350 separation, are connected only at the peripheral ring forming the outer edge of the  
351 septum, (23,24). Resolution of this peripheral wall involves mechanical crack  
352 propagation, but the contribution of cell wall hydrolases to the ultra-fast popping of *S.*  
353 *aureus* daughter cells remains poorly described (23). We demonstrate that high levels of  
354 Sle1 accelerate the onset of daughter cell separation starting from the peripheral wall  
355 indicating that Sle1 contributes to the timely degradation of the outer edge of the septal

356 wall. Sle1 is, however, not required for resolution of the outer septal wall, as separation  
357 of daughter cells is delayed not inhibited in cells lacking Sle1. Previously, cryo-electron  
358 microscopy revealed that, at the beginning of septation, the peripheral ring is thicker  
359 than other parts of the outer wall, and it was proposed that this extra cell wall material  
360 serve to protect the peripheral wall from degradation by the cell wall hydrolases  
361 functioning in presplitting of the septal cross-walls (24). Interestingly, the TEM and SR-  
362 SIM pictures presented here suggest that Sle1 degrades the peripheral wall from the  
363 exterior not from the interior. Taken together, our data support that high Sle1 levels  
364 promote daughter cell splitting, hence, indicating that the detrimental effect of  $\beta$ -lactam  
365 antibiotics is linked to impaired daughter cell separation.

366 We, similarly to others, observed that oxacillin delays cell separation (18,31,32), and  
367 based on the characteristic “hour-glass” morphology observed for wild-type cells  
368 exposed to oxacillin (indicating that splitting from the cell periphery has taken place, Fig.  
369 S3), we speculate that oxacillin primarily interferes with splitting of the interior septal  
370 cross-walls. Interestingly, the electron dense line that vanishes in oxacillin exposed cells  
371 was previously described as tubular packets enclosing autolytic enzymes that upon  
372 completion of the cross wall are released to facilitate cell separation (18,25).

373 Next, we showed that oxacillin reduces expression of Sle1 in JE2 cells, suggesting that  
374 oxacillin impairs daughter cell splitting by down-regulating Sle1 expression.

375 Interestingly, the Tomasz lab has convincingly shown that transcription of genes  
376 encoding cell wall hydrolases is tightly linked to activities of the PBPs, and that inhibition  
377 of PBP activity, either by genetic depletion or by treatment with  $\beta$ -lactam antibiotics,

378 reduces transcription of a number of cell wall hydrolase genes including *sle1* (33-35). In  
379 these studies, the  $\beta$ -lactam induced transcriptional repression of cell wall hydrolase  
380 genes was proposed to be a defence mechanism protecting cells with perturbed cell  
381 wall synthesis from the destructive forces of cell wall hydrolases. Based on our  
382 paradoxical finding that high levels of Sle1 increase resistance of *S. aureus* to  $\beta$ -lactam  
383 antibiotics, we instead hypothesize that the shut-down of transcription of *sle1* and other  
384 cell wall hydrolase genes in *S. aureus* cells exposed to  $\beta$ -lactam antibiotics is part of the  
385 mechanism that eventually end up killing the cells. Instead, we speculate that PBP-  
386 mediated transpeptidation, the last step in peptidoglycan synthesis, is involved in  
387 signaling that peptidoglycan synthesis is complete, and that it is time to activate  
388 expression of *sle1* and other cell wall hydrolases (Model depicted in Fig. 8). According to  
389 this model, the non-native PBP2a has an important role in activating expression of Sle1  
390 in cells, where the transpeptidase activity of native PBPs is inhibited by the irreversible  
391 binding of oxacillin to the active site (Fig. 8). Consistent with this model, we here show  
392 that while PBP2a is required for expression of Sle1 in JE2 cells exposed to oxacillin,  
393 deletion of *mecA* does not impact Sle1 levels in JE2 cells grown in the absence of  
394 oxacillin. The observation that Sle1 levels are reduced 2-fold upon exposure to oxacillin  
395 indicates that the non-native PBP2a is less efficient in promoting expression of Sle1 (Fig.  
396 8). In *S. aureus*, at least 13 genes encode known or putative peptidoglycan hydrolases  
397 (36). Transcription of many of these genes respond to PBP activity in a strain-dependent  
398 manner (33-35), hence, we speculate that the strain dependent resistance level,



399 conferred by *mecA*, is linked to the ability of PBP2a to co-ordinate expression of cell-wall  
400 hydrolases with septum synthesis.

401 Finally, we found that inactivation of *sle1* is synthetically lethal with sub-mic  
402 concentrations oxacillin in JE2. At present we cannot explain this finding, but the severe  
403 septum defects conferred by oxacillin in cells devoid of Sle1 activity indicate that Sle1  
404 and the transpeptidase activity of PBPs function synergistically to coordinate septum  
405 formation with daughter cell separation. Consistent with this finding, Matias and  
406 Beveridge (24) proposed that cell wall autolysins are required for synchronized growth  
407 of the septum. Intriguingly, a recent paper suggests that another *S. aureus* cell wall  
408 amidase, LytH, is involved in controlling the spatial distribution of peptidoglycan  
409 synthases to ensure that cell expansion is coordinated with cell division (37). Hence, the  
410 activities of cell wall hydrolases and PBPs may be tightly linked to balance peptidoglycan  
411 synthesis with autolytic degradation, and the binding of  $\beta$ -lactam antibiotics PBPs may  
412 perturb this delicate balance.

## 413 **Methods**

### 414 **Bacterial strains and growth conditions**

415 Bacterial strains used in this study are listed in table 2. *S. aureus* JE2, SA564 and 8325-4  
416 were used as wild-type strains. Strains were cultured in 20 ml tryptic soy broth (TSB;  
417 Oxoid) with shaking (170 rpm) at 37°C or on tryptic soy agar (TSA; Oxoid) at 37°C. In all  
418 experiments, bacterial strains were freshly streaked from the frozen stocks on TSA and  
419 incubated overnight at 37°C. From these plates, TSB cultures were inoculated to an  
420 OD<sub>600</sub> of 0.05 or below and optical densities (OD) measured at 600 nm.

421

### 422 **Construction of strains**

423 *Sle1* and *PBP2a* were inactivated by introducing *sle1::ΦNΣ* from NE1688 or *mecA::ΦNΣ*  
424 from NE1868, respectively, (38) using phage 85 and selecting for resistance to  
425 erythromycin. In order to construct a JE2 $clpX_{I268E}$ , *sle1* double mutant, JE2 chromosomal  
426 *clpX* was first replaced with an untagged version of *clpX<sub>I265E</sub>* (substituting the ATT codon  
427 with GAA\*ref) by phage 85 mediated transduction using 8325-4 $clpX_{I265E}$  (21) as the  
428 donor. In order to select for JE2 cells that had incorporated the marker-less *clpX<sub>I265E</sub>*  
429 variant, we took advantage of the finding that expression of the  $ClpX_{I265E}$  variant  
430 increases the resistance of JE2 to oxacillin by plating transductants at 50 μg ml<sup>-1</sup> oxacillin.  
431 Introduction of the *clpX<sub>I265E</sub>* variant was subsequently confirmed using a primer pair  
432 designed to distinguish wild-type *clpX* from *clpX<sub>I265E</sub>* (3' end is complementary to the  
433 mutated GAA codon, sequence underlined in primer:  $clpX_{I265E\_F}$  (5'- CGT CTT GGT GAA  
434 AAA GTT GAA) and  $clpX\_R$  (5'- CCG TGG CTA GCA TGT TTA AAT TCA ATG AAG A). To  
435 ensure that the high oxacillin concentration had not introduced additional mutations in

436 the genome of the JE2clpX<sub>I265E</sub> candidate, the genomes of the JE2 wild-type and the  
437 JE2clpX<sub>I265E</sub> candidate were sequenced by Illumina sequencing on a NextSeq instrument  
438 at the Danish National Reference Laboratories for Resistance Surveillance (SSI,  
439 Copenhagen, Denmark). All sequence analysis was performed in CLC Genomics  
440 Workbench Software, version 12.0 (<https://www.qiagenbioinformatics.com>). The  
441 sequencing reads from JE2 wild-type and the JE2clpX<sub>I265E</sub> candidate were mapped to  
442 USA300 FPR3757 chromosomal genome sequence (GenBank accession number  
443 NC\_007793.1). Genomic variations were identified using the “Basic Variant Detection”  
444 tool in CLC. This analysis confirmed the introduction of the GAA codon in JE2clpX<sub>I265E</sub>  
445 candidate, and identified three additional SNPs between the JE2 wild-type sequence and  
446 the sequence of the JE2clpX<sub>I265E</sub> candidate: one SNP was found in a non-coding region  
447 close to *clpX*, while the two others SNPs mapped in the *hemA* gene that is located one  
448 gene downstream of *clpX*. The *hemA* sequence in the JE2<sub>clpX</sub><sub>I265E</sub> candidate is identical to  
449 the *hemA* sequence in 8325-4, suggesting that all identified SNPs originate from 8325-  
450 4clpX<sub>I265E</sub> that was used as the donor in the transduction.

451

#### 452 **Susceptibility testing**

453 Susceptibility testing was performed by the Danish National Reference Laboratories for  
454 Resistance Surveillance (SSI, Copenhagen, Denmark) using Etest® (bioMérieux) to  
455 determine the MICs of oxacillin and including *S. aureus* strain ATCC43300 as a reference  
456 strain. The Sensititre™ Vizion™ broth microdilution system (Thermo Fisher Scientific)

457 was used to determine the MICs of all other antibiotics using *S. aureus* strain

458 ATCC29213 as a reference strain.

459

#### 460 **Population analysis profiles (PAP)**

461 Population analysis profiles were determined by plating appropriate dilutions of an

462 overnight *S. aureus* culture on TSA plates containing increasing concentrations of

463 oxacillin or ceftioxin (Sigma). Plates were incubated at 37°C for 48 h and the number of

464 colonies was determined and plotted against antibiotic concentration as described

465 previously (Sieradzki *et al.* 1998).

466

#### 467 **SR-SIM analysis**

468 **Imaging and sample preparation:** For SR-SIM analysis, cells were imaged with an Elyra

469 PS.1 microscope (Zeiss) using a Plan-Apochromat 63x/1.4 oil DIC M27 objective and a

470 Pco.edge 5.5 camera. Images were acquired with five grid rotations and reconstructed

471 using ZEN software (black edition, 2012, version 8.1.0.484) based on a structured

472 illumination algorithm, using synthetic, channel specific optical transfer functions and

473 noise filter settings ranging from -6 to -8. Laser specifications can be found in Table 3.

474 Prior to imaging, cultures of *S. aureus* were grown at 37°C for four generations before

475 dividing the cultures into two; one grown in the absence of oxacillin and the other

476 supplemented with 1.25  $\mu\text{g ml}^{-1}$  oxacillin. Cultures were grown for 20 minutes before

477 sample preparation. Cells were stained at 37°C for 5 min with the membrane dye Nile

478 Red, the cell wall dye WGA-488 and the fluorescent D-amino acid HADA (Table 3).

479 Samples were washed twice in PBS, placed on an agarose pad (1.2% in PBS), and  
480 visualized by SR-SIM as described above. SR-SIM analysis was performed at the Core  
481 Facility of Integrated Microscopy (CFIM).

482 **Analysis of the cell cycle:** To address progression of the cell cycle, 300 cells were scored  
483 according to the stage of septum ingrowth: no septum (phase 1), incomplete septum  
484 (phase 2), or non-separated cells with complete septum (phase 3). Scoring was based on  
485 the Nile Red staining. Dead cells were scored as collapsed cells with no HADA  
486 incorporation. To enumerate the fraction of phase 2 cells displaying symmetric septal  
487 ingrowth versus abnormal ingrowths, 100 Nile-Red stained cells displaying septal  
488 ingrowths were evaluated in each of two biological replicates. To quantify daughter cell  
489 splitting, 50 cells that had completed septum formation during the 5 minutes of HADA  
490 labeling were scored based on whether they displayed no septal splitting as depicted in  
491 Fig. 3A, i or septal splitting as depicted in figure Fig. 3A, ii-iii. This analysis was performed  
492 for two biological replicates.

493

494 **Estimating cell volume (size):** The volume of 300 cells representing 100 cells from each  
495 of the three different growth phases was determined (two biological replicates). An  
496 equal number of cells from each phase was used in order to avoid bias in average  
497 volume due to a shift in the phase distribution. Volume was determined as described in  
498 (Monteiro *et al.*, 2015). Briefly, an ellipse was fitted to the border limits of the  
499 membrane to acquire measurements of the minor and major axis. The cell shape was  
500 assumed to be that of a prolate spheroid and the volume was estimated using the

501 equation  $V = 4/3\pi ab^2$ ; where a and b correspond to the major and minor axes,  
502 respectively. Ellipse fitting and measurements were performed using Fiji (<http://fiji.sc>).

503

#### 504 **Statistical analysis**

505 All statistical analysis were performed using R statistical software. Student's t-test was  
506 used to assess significant differences in cell volume. The Chi-squared test of  
507 independence was used to determine if there was a significant relationship between the  
508 proportion of cells assigned to each of the three phases or relevant phenotypes under  
509 the tested condition (number of cells in the relevant phase or phenotype/the total  
510 number of cells). A value  $P < 0.05$  was considered significant.

511

#### 512 **Electron microscopy**

513 **Scanning electron microscopy (SEM).** Strains were grown in TSB at 37°C as specified  
514 with an initial starting OD of 0.02. Exponentially growing cells were collected and placed  
515 on ice for 5 min prior to centrifugation (13400 rpm; 1 min). Cell pellets were  
516 resuspended in fixation solution (2% glutaraldehyde in 0.05 M sodium phosphate buffer,  
517 pH 7.4) and deposited on the glass discs at 4°C for a minimum of 24 h. The specimens  
518 were subsequently washed three times in 0.15 M sodium phosphate buffer (pH 7.4) and  
519 post-fixed in 1% OsO<sub>4</sub> in 0.12 M sodium cacodylate buffer (pH 7.4) for two hours.  
520 Following a rinse in distilled water, the specimens were dehydrated to 100% ethanol  
521 according to standard procedures and critical point dried (Balzers CPD 030) with CO<sub>2</sub>.  
522 The specimens were subsequently mounted on stubs using double adhesive carbon tape

523 (Ted Pella) as an adhesive and sputter coated with 6 nm gold (Leica ACE 200). SEM  
524 observations were performed using a FEI Quanta 3D scanning electron microscope  
525 operated at an accelerating voltage of 2 kV.

526 **Transmission electron microscopy (TEM).** Strains were grown in TSB at 37°C as specified  
527 above, but with an initial OD<sub>600</sub> of 0.02 and at OD<sub>600</sub> = 0.2 the culture was divided in two;  
528 one without oxacillin and one supplemented with 1.25 µg ml<sup>-1</sup> oxacillin. The cultures  
529 were incubated at 37°C for 20 minutes. Cells were collected by centrifugation (8000 g; 5  
530 min) and suspended in fixation solution as above and incubated overnight at 4°C. The  
531 fixed cells were further embedded in agarose, rinsed three times in 0.15 M sodium  
532 phosphate buffer (pH 7.2), and subsequently post-fixed in 1% OsO<sub>4</sub> with 0.05 M  
533 K<sub>3</sub>Fe(CN)<sub>6</sub> in 0.12 M sodium phosphate buffer (pH 7.2) for two hours. The specimens  
534 were dehydrated in a graded series of ethanol, transferred to propylene oxide and  
535 embedded in Epon according to standard procedures. Sections, approximately 60 nm  
536 thick, were cut with an Ultracut 7 (Leica, Vienna, Austria) and collected on copper grids  
537 with Formvar supporting membranes, stained with uranyl acetate and lead citrate.

538 Specimens examined with a Philips CM 100 Transmission EM (Philips, Eindhoven, The  
539 Netherlands), operated at an accelerating voltage of 80 kV. Digital images were  
540 recorded with an Olympus Veleta digital slow scan 2.048 x 2.048 CCD camera and the  
541 ITEM software package.

542 All SEM and TEM processing and microscopy of fixed cells were performed at the CFIM.  
543

544 **Western blotting**

545 *S. aureus* cultures were inoculated in TSB at 37°C and grown for four generations.  
546 Cultures were divided into two; one without oxacillin and one supplemented with 8 µg  
547 ml<sup>-1</sup> oxacillin. The cultures were further incubated at 37°C for 60 minutes and cells were  
548 harvested at OD<sub>600</sub> of 1-2. Cell wall-associated proteins were extracted by resuspending  
549 pellet in 4% SDS (normalized to OD 1 ml<sup>-1</sup>) and incubated for 45 min at room  
550 temperature (37°C) with gentle shaking as described previously (41). For  
551 immunoblotting, samples were loaded on NuPAGE 10% Bis-Tris gels (Invitrogen™) using  
552 MOPS-Buffer (Invitrogen™). After separation, proteins were blotted onto a  
553 polyvinylidene difluoride (PVDF) membrane using the Invitrolon™ PVDF Filter Paper  
554 Sandwich (0.45 µm pore size, Invitrogen™). Membranes were pre-blocked with Human  
555 IgG to avoid a Protein A signal. The Sle1 protein was detected using rabbit-raised  
556 antibodies against staphylococcal Sle1 (14). Bound antibody was detected with the  
557 WesternBreeze Chemiluminescent Anti-Rabbit kit. Densitometry analysis for three  
558 biological replicates was performed using the ImageJ “Gel Analysis tool”, where the  
559 background from the gel was removed individually for each band

560

### 561 **Zymographic analysis**

562 Bacteriolytic enzyme profiles were obtained using a 10% SDS-PAGE with embedded  
563 heat-killed (125°C for 15 min) *S. aureus* JE2 wild-type cells as substrate. Autolytic  
564 enzyme-extracts were prepared by growing bacterial strains as described for western  
565 blotting. 10 ml of culture was withdrawn and washed twice with 1 volume of ice-cold  
566 cold 0.9% NaCl (FK). Cell wall-associated proteins were extracted by resuspending pellet



567 in 1 ml of 4% SDS (normalized to OD  $1 \text{ ml}^{-1}$ ) and incubating for 45 min at room  
568 temperature (37°C) with gentle shaking. Cells were precipitated (8000 rpm; 5 min) and  
569 the supernatant used as a source of enzymes. Following electrophoresis, the gel was  
570 washed with ionized water for 15 min three times and subsequently incubated for 20-24  
571 hours in renaturing buffer (50 mM Tris-HCl (pH 7.5), 0.1% Triton X-100, 10 mM CaCl<sub>2</sub>, 10  
572 mM MgCl<sub>2</sub>) at 37°C with gentle agitation. The gel was rinsed in ionized water, stained  
573 (0.4% methylene blue, 0.01% KOH, 22% EtOH) for 1 min, and destained with ionized  
574 water for 1 h with gentle agitation prior to photography.

575

#### 576 **Acknowledgments**

577 We greatly acknowledge Professor Simon Foster (University of Sheffield) for the  
578 generous gift of FDAA's, the Nebraska Transposon Mutant Library (NTML) for providing  
579 strains, and Motoyuki Sugai (Hiroshima University), for providing Sle1 antibodies.

580 Finally, we would like to thank the staff at the Core Facility for Integrated Microscopy  
581 (University of Copenhagen) for their enthusiastic assistance in doing SEM, TEM and SR-  
582 SIM.

583

584

585 **References**

586 **References**

- 587 1. Vestergaard M, Frees D, Ingmer H. 2019. Antibiotic resistance and the  
588 MRSA problem. *Microbiol Spectr* **7**(2). doi: 10.1128/microbiolspec.GPP3-0057-2018.
- 589 2. Thurlow LR, Joshi GS, Richardson AR. 2012. Virulence strategies of the  
590 dominant USA300 lineage of community-associated methicillin-resistant *Staphylococcus*  
591 *aureus* (CA-MRSA). *FEMS Immunol Med Microbiol* **65**:5–22.
- 592 3. Bal AM, Coombs GW, Holden MTG, Lindsay JA, Nimmo GR, Tattevin P, Skov  
593 RL. 2016. Genomic insights into the emergence and spread of international clones of  
594 healthcare-, community- and livestock-associated methicillin-resistant *Staphylococcus*  
595 *aureus*: Blurring of the traditional definitions. *J Glob Antimicrob Resist* **6**:95–101.
- 596 4. Memmi G, Filipe SR, Pinho MG, Fu Z, Cheung A. 2008. *Staphylococcus*  
597 *aureus* PBP4 is essential for  $\beta$ -lactam resistance in community-acquired methicillin-  
598 resistant strains. *Antimicrob Agents Chemother* **52**:3955–3966.
- 599 5. Bæk KT, Gründling A, Mogensen RG, Thøgersen L, Petersen A, Paulander  
600 W, Frees D. 2014.  $\beta$ -lactam resistance in methicillin-resistant *Staphylococcus aureus*  
601 USA300 is increased by inactivation of the ClpXP protease. *Antimicrob Agents*  
602 *Chemother* **58**:4593–4603.
- 603 6. Anowar Khasru Parvez M, Shibata H, Nakano T, Niimi S, Fujii N, Arakaki N,  
604 Higuti T. 2008. No relationship exists between PBP 2a amounts expressed in different  
605 MRSA strains obtained clinically and their  $\beta$ -lactam MIC values. *J Med Investig* **55**:246–  
606 253.

- 607 7. Hososaka Y, Hanaki H, Endo H, Suzuki Y, Nagasawa Z, Otsuka Y, Nakae T,  
608 Sunakawa K. 2007. Characterization of oxacillin-susceptible *mecA*-positive  
609 *Staphylococcus aureus*: A new type of MRSA. *J Infect Chemother* **13**:79–86.
- 610 8. Murakami K, Tomasz A. 1989. Involvement of multiple genetic  
611 determinants in high-level methicillin resistance in *Staphylococcus aureus*. *J Bacteriol*  
612 **171**:874–879.
- 613 9. Hartman BJ, Tomasz A. 1986. Expression of methicillin resistance in  
614 heterogeneous strains of *Staphylococcus aureus*. *Antimicrob Agents Chemother* **29**:85–  
615 92.
- 616 10. Katayama Y, Zhang HZ, Chambers HF. 2003. Effect of disruption of  
617 *Staphylococcus aureus* PBP4 gene on resistance to  $\beta$ -lactam antibiotics. *Microb Drug*  
618 *Resist* **9**:329-336.
- 619 11. Olivares AO, Baker TA, Sauer RT. 2016. Mechanistic insights into bacterial  
620 AAA+ proteases and protein-remodelling machines. *Nat Rev Microbiol* **14**:33-44.
- 621 12. Pamp SJ, Frees D, Engelmann S, Hecker M, Ingmer H. 2006. Spx is a global  
622 effector impacting stress tolerance and biofilm formation in *Staphylococcus aureus*. *J*  
623 *Bacteriol* **188**:4861–4870.
- 624 13. Feng J, Michalik S, Varming AN, Andersen JH, Albrecht D, Jelsbak L, Krieger  
625 S, Ohlsen K, Hecker M, Gerth U, Ingmer H, Frees D. 2013. Trapping and proteomic  
626 identification of cellular substrates of the ClpP protease in *Staphylococcus aureus*. *J*  
627 *Proteome Res* **12**:547–558.

- 628 14. Kajimura J, Fujiwara T, Yamada S, Suzawa Y, Nishida T, Oyamada Y, Hayashi  
629 I, Yamagishi J, Komatsuzawa H, Sugai M. 2005. Identification and molecular  
630 characterization of an N -acetylmuramyl- l -alanine amidase Sle1 involved in cell  
631 separation of *Staphylococcus aureus*. *Mol Microbiol* **58**:1087–1101.
- 632 15. Kitano K, Tomasz A. 1979. Triggering of autolytic cell wall degradation in  
633 *Escherichia coli* by beta-lactam antibiotics. *Antimicrob Agents Chemother* **16**:838–848.
- 634 16. Bayles KW. 2000. The bactericidal action of penicillin: new clues to an  
635 unsolved mystery. *Trends Microbiol* **8**:274–278.
- 636 17. Cho H, Uehara T, Bernhardt TG. 2014. Beta-lactam antibiotics induce a  
637 lethal malfunctioning of the bacterial cell wall synthesis machinery. *Cell* **159**:1300–1311.
- 638 18. Giesbrecht P, Kersten T, Maidhof H, Wecke J. 1998. Staphylococcal cell  
639 wall: morphogenesis and fatal variations in the presence of penicillin. *Microbiol Mol Biol*  
640 *Rev* **62**:1371–1414.
- 641 19. Frees D, Chastanet A, Qazi S, Sørensen K, Hill P, Msadek T, Ingmer H. 2004.  
642 Clp ATPases are required for stress tolerance, intracellular replication and biofilm  
643 formation in *Staphylococcus aureus*. *Mol Microbiol* **54**:1445–1462.
- 644 20. Wawrzynow A, Wojtkowiak D, Marszalek J, Banecki B, Jonsen M, Graves B,  
645 Georgopoulos C, Zylicz M. 1995. The ClpX heat-shock protein of *Escherichia coli*, the  
646 ATP-dependent substrate specificity component of the ClpP-ClpX protease, is a novel  
647 molecular chaperone. *EMBO J* **14**:1867–1877.

- 648 21. Stahlhut SG, Alqarzaee AA, Jensen C, Fisker NS, Pereira AR, Pinho MG,  
649 Thomas VC, Frees D. 2017. The ClpXP protease is dispensable for degradation of  
650 unfolded proteins in *Staphylococcus aureus*. *Sci Rep* **7**:11739.
- 651 22. Monteiro JM, Fernandes PB, Vaz F, Pereira AR, Tavares AC, Ferreira MT,  
652 Pereira PM, Veiga H, Kuru E, VanNieuwenhze MS, Brun Y V., Filipe SR, Pinho MG. 2015.  
653 Cell shape dynamics during the staphylococcal cell cycle. *Nat Commun* **6**:8055.
- 654 23. Zhou X, Halladin DK, Rojas ER, Koslover EF, Lee TK, Huang KC, Theriot JA.  
655 2015. Mechanical crack propagation drives millisecond daughter cell separation in  
656 *Staphylococcus aureus*. *Science* **348**:574–578.
- 657 24. Matias VR, Beveridge TJ. 2007. Cryo-electron microscopy of cell division in  
658 *Staphylococcus aureus* reveals a mid-zone between nascent cross walls. *Mol Microbiol*  
659 **64**:195-206.
- 660 25. Paul TR, Venter A, Blaszcak LC, Parr TR, Labischinski H, Beveridge TJ. 1995.  
661 Localization of penicillin-binding proteins to the splitting system of *Staphylococcus*  
662 *aureus* septa by using a mercury-penicillin V derivative. *J Bacteriol* **177**:3631–3640.
- 663 26. Oshida T, Sugai M, Komatsuzawa H, Hong YM, Suginaka H, Tomasz A. 1995.  
664 A *Staphylococcus aureus* autolysin that has an N-acetylmuramoyl-L-alanine amidase  
665 domain and an endo-beta-N-acetylglucosaminidase domain: cloning, sequence analysis,  
666 and characterization. *Proc Natl Acad Sci* **92**:285–289.
- 667 27. Sugai M, Komatsuzawa H, Akiyama T, Hong YM, Oshida T, Miyake Y,  
668 Yamaguchi T, Suginaka H. 1995. Identification of endo- $\beta$ -N-acetylglucosaminidase and

- 669 N-acetylmuramyl-L- alanine amidase as cluster-dispersing enzymes in *Staphylococcus*  
670 *aureus*. *J Bacteriol* **177**:1491–1496.
- 671 28. Bose JL, Lehman MK, Fey PD, Bayles KW. 2012. Contribution of the  
672 *Staphylococcus aureus* Atl AM and GL murein hydrolase activities in cell division,  
673 autolysis, and biofilm formation. *PLoS One* **7**:e42244.
- 674 29. Schneider T, Sahl HG. 2010. An oldie but a goodie - cell wall biosynthesis as  
675 antibiotic target pathway. *Int J Med Microbiol* **300**:161-169.
- 676 30. Tomasz A. 1979. The mechanism of the irreversible antimicrobial effects of  
677 penicillins: how the  $\beta$ -lactam antibiotics kill and lyse bacteria. *Annu Rev Microbiol* **33**:  
678 113–137.
- 679 31. Jensen C, Bæk KT, Gallay C, Thalsø-Madsen I, Xu L, Jousselin A, Torrubia FR,  
680 Paulander W, Pereira AR, Veening J-W, Pinho MG, Frees D. *PLoS Pathog*, in press. The  
681 ClpX chaperone controls autolytic splitting of *Staphylococcus aureus* daughter cells, but  
682 is bypassed by  $\beta$ -lactam antibiotics or inhibitors of WTA biosynthesis.
- 683 32. Lorian V. 1975. Some effects of subinhibitory concentrations of antibiotics  
684 on bacteria. *Bull N Y Acad Med* **51**:1046–1055.
- 685 33. Antignac A, Sieradzki K, Tomasz A. 2007. Perturbation of cell wall synthesis  
686 suppresses autolysis in *Staphylococcus aureus*: evidence for coregulation of cell wall  
687 synthetic and hydrolytic enzymes. *J Bacteriol* **189**:7573–7580.
- 688 34. Gardete S, Lencastre H de, Tomasz A. 2006. A link in transcription between  
689 the native *pbpB* and the acquired *mecA* gene in a strain of *Staphylococcus aureus*.  
690 *Microbiology* **152**:2549–2558.

- 691 35. Pereira SFF, Henriques AO, Pinho MG, Lencastre H de, Tomasz A. 2009.  
692 Evidence for a dual role of PBP1 in the cell division and cell separation of *Staphylococcus*  
693 *aureus*. *Mol Microbiol* **72**:895–904.
- 694 36. Pasztor L, Ziebandt AK, Nega M, Schlag M, Haase S, Franz-Wachtel M,  
695 Madlung J, Nordheim A, Heinrichs DE, Götz F. 2010. Staphylococcal major autolysin (Atl)  
696 is involved in excretion of cytoplasmic proteins. *J Biol Chem* **285**:36794-36803.
- 697 37. Do T, Schaefer K, Santiago AG, Coe KA, Pedro B, Kahne D, Pinho MG,  
698 Walker S. 2019. The cell cycle in *Staphylococcus aureus* is regulated by an amidase that  
699 controls peptidoglycan synthesis. bioRxiv 634089; doi: <https://doi.org/10.1101/634089>.
- 700 38. Fey PD, Endres JL, Yajjala VK, Widhelm TJ, Boissy RJ, Bose JL, Bayles KW.  
701 2013. A genetic resource for rapid and comprehensive phenotype screening of  
702 nonessential *Staphylococcus aureus* genes. *mBio* **4**:e00537–12.  
703 <http://dx.doi.org/10.1128/mBio.00537-12>.
- 704 39. Somerville GA, Beres SB, Fitzgerald JR, DeLeo FR, Cole RL, Hoff JS,  
705 Musser JM. 2002. *In vitro* serial passage of *Staphylococcus aureus*: changes  
706 in physiology, virulence factor production, and *agr* nucleotide sequence. *J*  
707 *Bacteriol* **184**:1430–1437.
- 708 40. Benjamini Y, Drai D, Elmer G, Kafkafi N, Golani I. 2001. Controlling the false  
709 discovery rate in behavior genetics research. *Behav Brain Res* **125**:279–284.
- 710 41. Sieradzki K, Villari P, Tomasz A. 1998. Decreased susceptibilities to  
711 teicoplanin and vancomycin among coagulase-negative methicillin-resistant clinical  
712 isolates of staphylococci. *Antimicrob Agents Chemother* **42**:100-107.

- 713 42. Sugai M, Akiyama T, Komatsuzawa H, Miyake Y, Suginaka H. 1990.  
714 Characterization of sodium dodecyl sulfate-stable *Staphylococcus aureus* bacteriolytic  
715 enzymes by polyacrylamide gel electrophoresis. *J Bacteriol* **172**:6494-6498.



716 **Figure legends**

717 **Fig 1. Population analyses profiles show that inactivation of *sle1* renders the JE2 wild-**  
718 **type and JE2clpX<sub>I265E</sub> homogenously sensitive to oxacillin and cefoxitin.**

719 CFU ml<sup>-1</sup> for JE2 wild type, JE2clpX<sub>I265E</sub>, JE2sle1 and JE2clpX<sub>I265E</sub>,sle1 were determined  
720 after plating on increasing concentrations of oxacillin (A), and cefoxitin (B), as indicated.  
721 Representative data from three individual experiments are shown.

722

723 **Fig 2. Sle1 and oxacillin impact the *S. aureus* cell cycle.**

724 JE2 wild-type , JE2clpX<sub>I265E</sub>, JE2sle1, and JE2clpX<sub>I265E</sub>, sle1 were grown exponentially at  
725 37°C in the absence (A) or presence of 0.05 µg ml<sup>-1</sup> oxacillin (B); cells were then stained  
726 with membrane dye Nile Red (red) before imaging by SR-SIM. To assess the effect of the  
727 mutations on progression of the growth cycle, 300 cells (from each of two biological  
728 replicates) were scored according to the stage of septum ingrowth: no septum (phase  
729 1), incomplete septum (phase 2), or non-separated cells with complete septum (phase  
730 3).

731 **Fig 3. High Sle1 levels accelerate splitting of *S. aureus* daughter cells, while inactivation**  
732 **of Sle1 and oxacillin delays splitting of fully divided daughter cells.**

733 JE2 wild type, JE2sle1, JE2clpX<sub>I265E</sub> and JE2clpX<sub>I265E</sub>, sle1 were grown exponentially at  
734 37°C in the absence (A-B) or presence of 0.05 µg ml<sup>-1</sup> oxacillin (C); cells were then  
735 stained for 5 minutes with WGA-488 (green) that stains the old peptidoglycan, and  
736 HADA (blue), that is incorporated into newly synthesized peptidoglycan. Cells were  
737 imaging by SR-SIM. The dual peptidoglycan staining allowed us to directly identify

738 daughter cells pairs that have separated following WGA/HADA staining, as these  
739 daughter cells display a characteristic labeling pattern with the “old” peripheral cell wall  
740 stained in green, while the “novel” peripheral cell wall of septal origin is stained in blue  
741 (22,23). A) displays example images of cells that have completed septum synthesis  
742 during the labeling period and have either i) not separated following labeling or ii-iii)  
743 initiated daughter cell separation following labeling (shown from two different  
744 orientations). Images shown in B and C is displayed with the same intensity of WGA and  
745 HADA signal, respectively, with the exception of the WGA signal in JE2clpX<sub>I265E</sub> cells that  
746 has been increased due to the otherwise weak signal in this mutant – both in the  
747 absence or presence of oxacillin. D-E) 50 cells that completed septum formation during  
748 the labeling period was scored according to splitting of the newly synthesized HADA or  
749 no splitting. D) P-values were obtained by Chi-square test against the wild-type. E) P-  
750 values were obtained by Chi-square test against the sample grown in the absence of  
751 oxacillin.

752

753 **Fig 4. High Sle1 activity reduces the cell size, while oxacillin increases cell size.**

754 JE2 wild type, JE2clpX<sub>I265E</sub>, JE2sle1, JE2clpX<sub>I265E</sub>, sle1 were grown exponentially at 37°C in  
755 the absence (A) or presence of 0.05 µg ml<sup>-1</sup> oxacillin (B); cells were then stained with  
756 membrane dye Nile Red (red) before imaging by SR-SIM. Cell volume of 300 cells  
757 representing 100 cells from each of the three growth phases was determined by fitting  
758 an ellipse to the border limits of the membrane. Graph represents data from two  
759 biological replicates.

760

761 **Fig 5. Perforations in the peripheral septal wall correlate with *Sle1* levels.**

762 SEM images of JE2 wild-type, *sle1*, *clpX<sub>I265E</sub>* or *clpX<sub>I265E</sub>, sle1* grown in TSB to mid-  
763 exponential phase at 37°C. The images show invaginations (black arrowhead) and  
764 perforations (white arrowhead) at mid-cell along the septal ring. The larger cracks in  
765 *clpX<sub>I265E</sub>*, is indicated with a white arrow. Scale bars, 1  $\mu\text{m}$  (overview) and 0.5  $\mu\text{m}$   
766 (zoom).

767

768 **Fig 6: TEM and SR-SIM reveal severe septal abnormalities in *sle1* cells exposed to**

769 **oxacillin.** TEM and SR-SIM images of JE2 wild-type (A), *clpX<sub>I265E</sub>* (B) or *sle1* (C) grown to  
770 mid-exponential phase at 37°C in the absence (left panels) or presence of 1.25  $\mu\text{g ml}^{-1}$   
771 oxacillin for 20 minutes (right panels) as indicated. Images show the characteristic  
772 changes induced by oxacillin determined from at least two biological replicates. (A,B) In  
773 JE2 wild-type and JE2*clpX<sub>I265E</sub>* cells, oxacillin treatment leads to septal abnormalities  
774 including curving and thickening of the septa and blurring of the electron-dense mid-  
775 zone. (C) In JE2*sle1* cells, the effect of oxacillin is exaggerated; i-iv) septa are devoid of  
776 the electron-dense mid-zone, ii) septa appearing not to be attached to the septal wall,  
777 but 3D rotation reveal a non-circular septal pattern, iii) septa protruding asymmetrically  
778 inwards, and iv) lysis in daughter cell pairs where the lyzed cell is attached to a living  
779 cell. Scale bar, TEM; 0.2  $\mu\text{m}$ , SR-SIM; 0.5  $\mu\text{m}$ .

780

781 **Fig 7. Oxacillin reduces expression of Sle1, and PBP2a is required for expression of Sle1**  
782 **in JE2 cells exposed to oxacillin**

783 (A) Zymogram assay. JE2 and its derived strains were grown to exponential phase in the  
784 absence (-) or presence (+) of  $8 \mu\text{g ml}^{-1}$  oxacillin as indicated, and equal amounts of cell  
785 wall-associated proteins were loaded onto an SDS polyacrylamide gel containing heat-  
786 killed *S. aureus* JE2 cells. One representative gel of two biological independent  
787 experiments is shown as an inverted image of the strained gel. The positions of the  
788 molecular mass standards are indicated (in kilodaltons) on the left. Asterisks indicates  
789 AtI bands that are diminished in oxacillin exposed JE2 cells lacking Sle1 or PBP2A. (B)  
790 Sle1 levels in cell wall extracts were additionally determined by Western blot analysis in  
791 three biological replicates. Densitometry analysis was performed using Fiji. Obtained  
792 values were normalized to values obtained for the wild-type and are displayed below  
793 the corresponding bands.

794

795

796 **Fig 8. Sle1 in *S. aureus* daughter cell splitting, model.**

797 Model of delayed daughter cell splitting in the absence of Sle1 and accelerated splitting  
798 in cells with high Sle1 levels. In wild-type cells, progression of the cell cycle goes from  
799 spherical cells with no septum (phase 1) to formation (phase 2) and closing/ completion  
800 of the septum (phase 3). Following this, resolution of the peripheral wall and  
801 subsequent rapid popping of daughter cells takes place. In the absence of Sle1, cells stay  
802 longer in phase 3 and some daughter cells initiate formation of a new septum before

803 separation of daughter cells has occurred. However, in *clpX*<sub>I265E</sub> that has high levels of  
804 Sle1, the onset of daughter cell splitting is accelerated and cells spend less time in phase  
805 3. Illustration made by Esben Thalsø-Madsen.

806

807 **S1 Fig.  $\beta$ -lactam susceptibility in JE2 is correlated with Sle1 levels.**

808 *S. aureus* JE2 wild-type (1), *sle1* (2), *clpX*<sub>I265E</sub> (3) and *clpX*<sub>I265E</sub> *sle1* (4) were grown  
809 exponentially in TSB at 37°C. At OD<sub>600</sub> = 0.5, cultures were diluted 10<sup>1</sup>, 10<sup>2</sup>, 10<sup>3</sup> and 10<sup>4</sup>-  
810 fold. 10  $\mu$ l of 10<sup>0</sup> and each dilution were spotted on TSA plates with or without  $\beta$ -  
811 lactams as indicated.

812

813 **Fig S2: Oxacillin interferes with peptidoglycan synthesis in cells devoid of Sle1.** SR-SIM  
814 images of JE2 wild-type, *clpX*<sub>I265E</sub>, or *sle1* grown to mid-exponential phase at 37°C in the  
815 absence or presence of 1.25  $\mu$ g ml<sup>-1</sup> or 10  $\mu$ g ml<sup>-1</sup> oxacillin for 20 minutes as indicated.  
816 White asterisk indicates examples of cells with no active peptidoglycan synthesis (no  
817 HADA signal) and green asterisk indicates examples lyzed cells.

818

819 **Fig. S3 TEM images showing morphological changes in cells exposed to oxacillin.**

820 TEM images of JE2 wild-type, *sle1* or *clpX*<sub>I265E</sub> grown in TSB to mid-exponential phase at  
821 37°C in the absence (-) or presence of 1.25  $\mu$ g ml<sup>-1</sup> oxacillin (+). Images show several  
822 characteristic morphologies of  $\beta$ -lactam treated wild-type and mutant cells also  
823 described in Fig. 6 indicated with black arrows (i-iv). These include i-iv) septa devoid of  
824 the electron-dense mid-zone; ii) septa appearing not to be attached to the septal wall;

825 iii) septa protruding asymmetrically inwards often only from one side and iv) lysis of  
826 cells occurring in daughter cell pairs where the lysed cell is still attached to a living cell.  
827 The “hour-glass” figure is indicated with a white arrowhead. The scale bar corresponds  
828 to 0.5  $\mu\text{m}$ .

829

830 **Fig S4. Sle1 does not accumulate intracellularly in cells exposed to oxacillin.**

831 (A) Zymography demonstrating that the activity of Atl is visible in multiple bands  
832 reflecting that the bifunctional Atl murein hydrolase is produced as a precursor protein  
833 (Pro-Atl) that is sequentially cleaved to generate several intermediates (B) Sle1 levels in  
834 whole cell extracts from JE2 wild-type, *clpX<sub>I265E</sub>*, *sle1* and *mecA* grown at 37°C in the  
835 absence (-) or presence (+) of 8  $\mu\text{g/ml}$  oxacillin, were determined by western blotting  
836 using a Sle1 specific antibody. Densitometry analysis was performed using ImageJ, and  
837 values were normalized wild-type values and is displayed below the bands. In contrast  
838 to cell wall fractions (Fig. 7), the Sle1 antibody recognizes two bands of similar sizes in  
839 the whole cell extract that both disappears in the *sle1* mutant. Based on these  
840 observations we speculate that they represent Sle1 with (Sle1\*) and Sle1 without a  
841 signal peptide attached.

842

843 **Table 1:  $\beta$ -lactam susceptibility of *sle1*, *clpX*<sub>1265E</sub>, *clpX*<sub>1265E</sub> *sle1* and *mecA* mutants in**  
 844 **MRSA (JE2) and MSSA (SA564 and 8325-4) wild-type (WT) backgrounds. MIC ( $\mu\text{g ml}^{-1}$ )**  
 845 **is as indicated below.**

| Antibiotic | JE2   |             |             |                              |                                            |                                            | SA564 |             |                              | 8325-4 |             |                              |
|------------|-------|-------------|-------------|------------------------------|--------------------------------------------|--------------------------------------------|-------|-------------|------------------------------|--------|-------------|------------------------------|
|            | WT    | <i>sle1</i> | <i>mecA</i> | <i>clpX</i> <sub>1265E</sub> | <i>clpX</i> <sub>1265E</sub> , <i>sle1</i> | <i>clpX</i> <sub>1265E</sub> , <i>mecA</i> | WT    | <i>sle1</i> | <i>clpX</i> <sub>1265E</sub> | WT     | <i>sle1</i> | <i>clpX</i> <sub>1265E</sub> |
| Oxacillin  | 32-64 | 0.5         | 0.75        | >256                         | 0.5                                        | 1                                          | 0.5   | 0.5         | 0.75                         | 0.38   | 0.25        | 0.5                          |
| Imipenem   | 0.12  | 0.12        | 0.12        | 0.25                         | 0.25                                       | <0.25                                      | 0.5   | 0.12        | 0.12                         | 0.12   | 0.12        | 0.12                         |
| Cefotaxime | 8     | 2-4         | 2           | 64                           | 2                                          | 4                                          | 4     | 2           | 4                            | 1      | 1           | 1                            |
| Cefoxitin  | 16    | 4           | 4           | 32                           | 4                                          | 4                                          | 4     | 4           | 4                            | 2      | 2           | 4                            |
| Cefepime   | 4     | 2           | 2           | >32                          | 4-8                                        | 4                                          | 4     | 4           | 4                            | 2      | 1           | 2                            |
| Ertapenem  | 0.5   | 0.12        | 0.25        | >2                           | 0.12                                       | 0.25                                       | 0.5   | 0.12        | 0.25                         | 0.12   | 0.12        | 0.25                         |
| Meropenem  | 0.25  | 0.12        | 0.12        | 2                            | 0.12                                       | 0.12                                       | 0.12  | 0.06        | 0.25                         | 0.12   | 0.06        | 0.12                         |

846

847 **Table 2: Bacterial strains used in the present study**

| Strain                                              | Description                                                                                                                               | Source     |
|-----------------------------------------------------|-------------------------------------------------------------------------------------------------------------------------------------------|------------|
| <b>JE2</b>                                          | CA-MRSA strain USA300 LAC cured of plasmids                                                                                               | (38)       |
| <b>JE2 <i>sle1</i></b>                              | <i>sle1</i> :: $\Phi\text{N}\Sigma$ transduced from NE1688 (Fey <i>et al.</i> , 2013) into JE2 wild-type                                  | This study |
| <b>JE2 <i>clpX</i><sub>1265E</sub></b>              | <i>clpX</i> <sub>1265E</sub> variant from 8325-4 <i>clpX</i> <sub>1265E</sub> transduced into JE2 wild-type                               | This study |
| <b>JE2 <i>clpX</i><sub>1265E</sub>, <i>sle1</i></b> | <i>sle1</i> :: $\Phi\text{N}\Sigma$ transduced from NE1688 (Fey <i>et al.</i> , 2013) into JE2 <i>clpX</i> <sub>1265E</sub> . <i>ermB</i> | This study |
| <b>JE2 <i>mecA</i></b>                              | <i>mecA</i> :: $\Phi\text{N}\Sigma$ transduced from NE1868 (Fey <i>et al.</i> , 2013) into JE2 wild-type. <i>ermB</i>                     | This study |
| <b>JE2 <i>clpX</i><sub>1265E</sub>, <i>mecA</i></b> | <i>mecA</i> :: $\Phi\text{N}\Sigma$ transduced from NE1868 (Fey <i>et al.</i> , 2013) into JE2 <i>clpX</i> <sub>1265E</sub> . <i>ermB</i> | This study |
| <b>SA564</b>                                        | Low-passage clinical isolate                                                                                                              | (39)       |
| <b>SA564 <i>sle1</i></b>                            | <i>sle1</i> :: $\Phi\text{N}\Sigma$ transduced from NE1688 (Fey <i>et al.</i> , 2013) into SA564 wild-type. <i>ermB</i>                   | This study |
| <b>SA564 <i>clpX</i><sub>1265E</sub></b>            | <i>clpX</i> <sub>1265E</sub> variant from 8325-4 <i>clpX</i> <sub>1265E</sub> transduced into SA564 wild-type                             | This study |
| <b>8325-4</b>                                       | Widely used wild-type strain cured of all prophages                                                                                       | (40)       |
| <b>8325-4 <i>sle1</i></b>                           | <i>clpX</i> <sub>1265E</sub> variant from 8325-4 <i>clpX</i> <sub>1265E</sub> transduced into 8325-4 wild-type. <i>ermB</i>               | This study |
| <b>8325-4 <i>clpX</i><sub>1265E</sub></b>           | 8325-4 expressing a <i>ClpX</i> <sub>1265E</sub> variant from the native <i>clpX</i> locus                                                | (21)       |

848

849 **Table 3: Staining and laser specifications used for SR-SIM**

| Staining        | Concentration           | Target   | Laser  | Laser Type       | Laser power | Beam splitter       | Grating          |
|-----------------|-------------------------|----------|--------|------------------|-------------|---------------------|------------------|
| <b>Nile Red</b> | 5 $\mu\text{g ml}^{-1}$ | Membrane | 561 nm | HR Diode – 100mW | 5 %         | BP 570-650 + LP 750 | 34 $\mu\text{m}$ |
| <b>HADA</b>     | 250 $\mu\text{M}$       | Old PG   | 405 nm | HR Diode – 50mW  | 20 %        | BP 420-480 + LP 750 | 23 $\mu\text{m}$ |
| <b>WGA-488</b>  | 1 $\mu\text{g ml}^{-1}$ | New PG   | 488 nm | HR Diode – 100mW | 5 %         | BP 495-575 + LP 750 | 28 $\mu\text{m}$ |

850

851

A

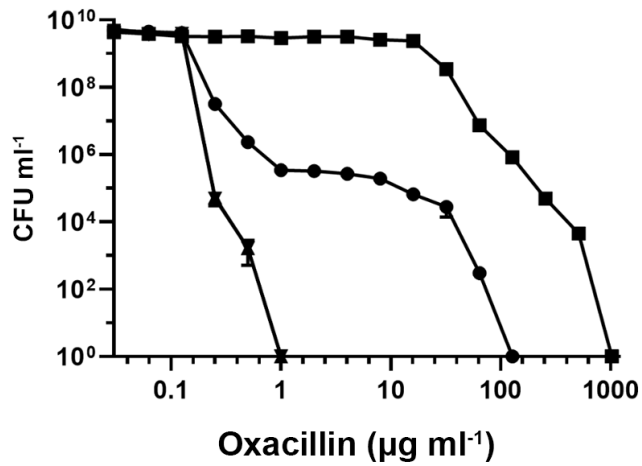

B

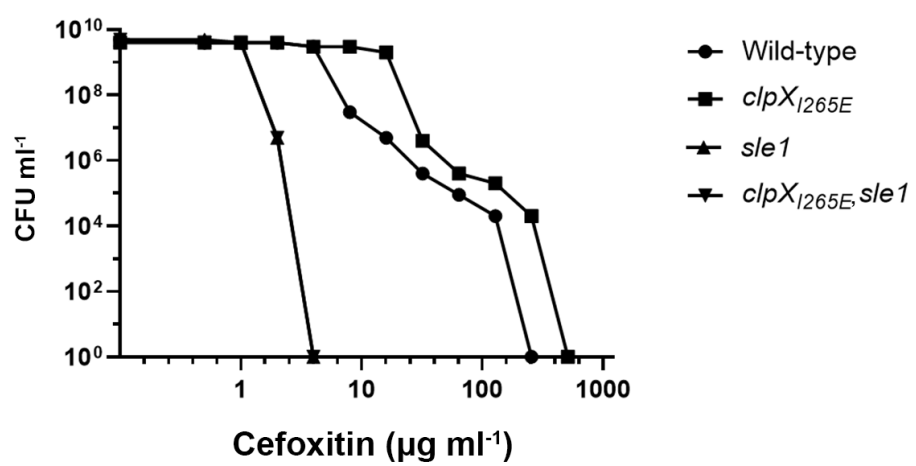



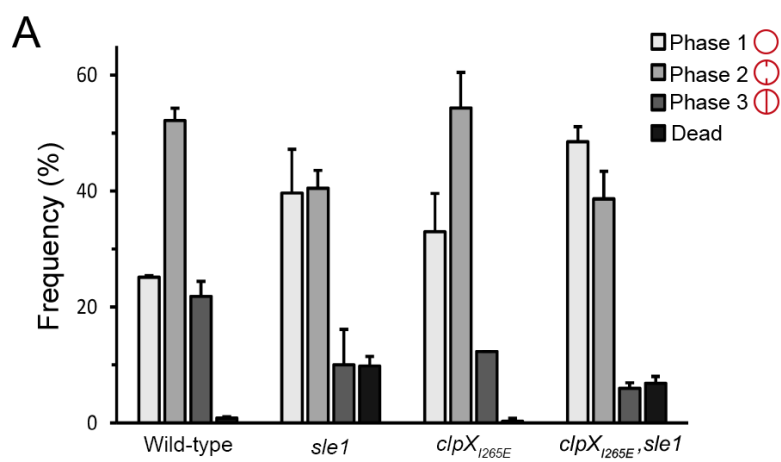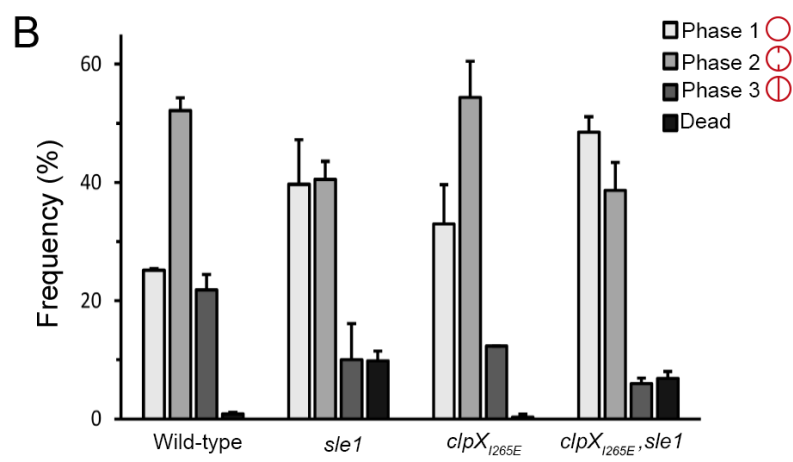

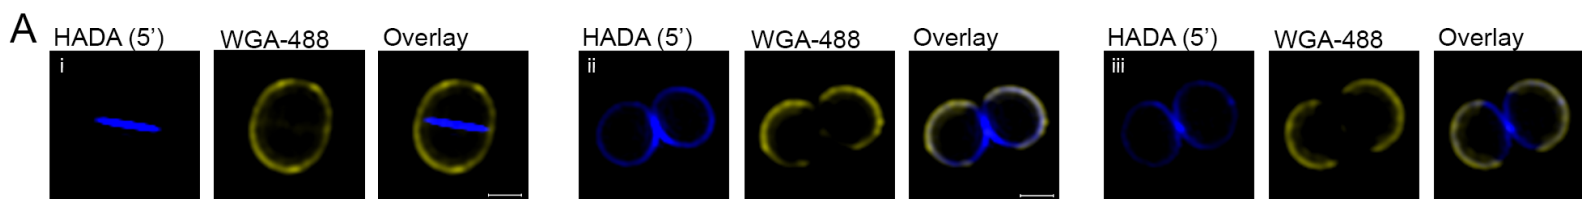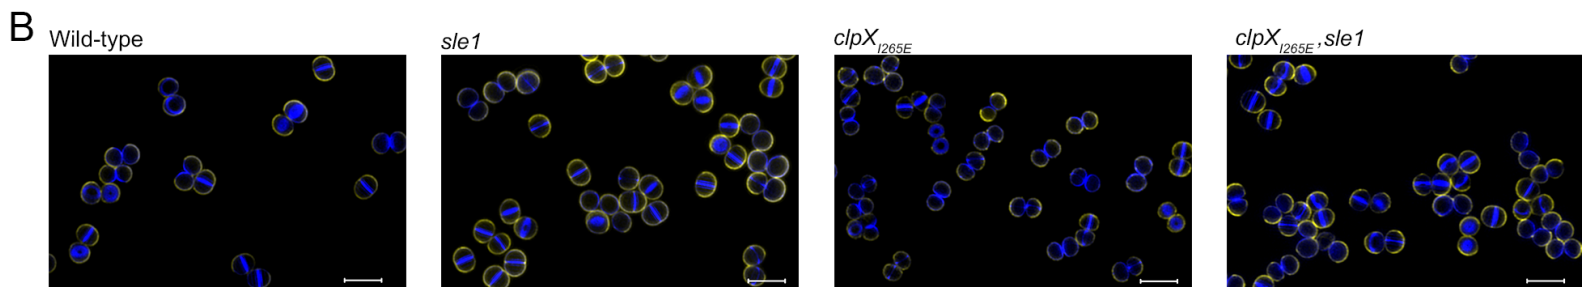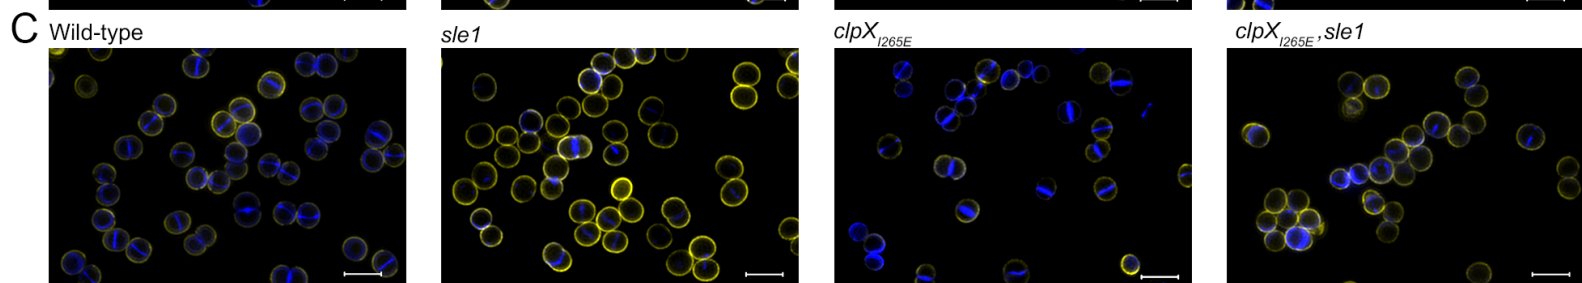

**D**

| Frequency (%)                            | Septal split | No septal split | P-value  |
|------------------------------------------|--------------|-----------------|----------|
| Wild-type                                | 31 ± 1%      | 69 ± 1%         |          |
| <i>sle1</i>                              | 7 ± 1%       | 93 ± 1%         | P<0.0001 |
| <i>clpX</i> <sub>I265E</sub>             | 68 ± 1%      | 32 ± 1%         | P<0.0001 |
| <i>clpX</i> <sub>I265E</sub> <i>sle1</i> | 39 ± 1%      | 61 ± 1%         | P=0.299  |

n=50

**E**

| Frequency (%)                            | Septal split | No septal split | P-value  |
|------------------------------------------|--------------|-----------------|----------|
| Wild-type                                | 8 ± 3%       | 92 ± 3%         | P<0.0001 |
| <i>sle1</i>                              | ND           | ND              | ND       |
| <i>clpX</i> <sub>I265E</sub>             | 33 ± 4%      | 67 ± 4%         | P<0.0001 |
| <i>clpX</i> <sub>I265E</sub> <i>sle1</i> | ND           | ND              | ND       |

n=50

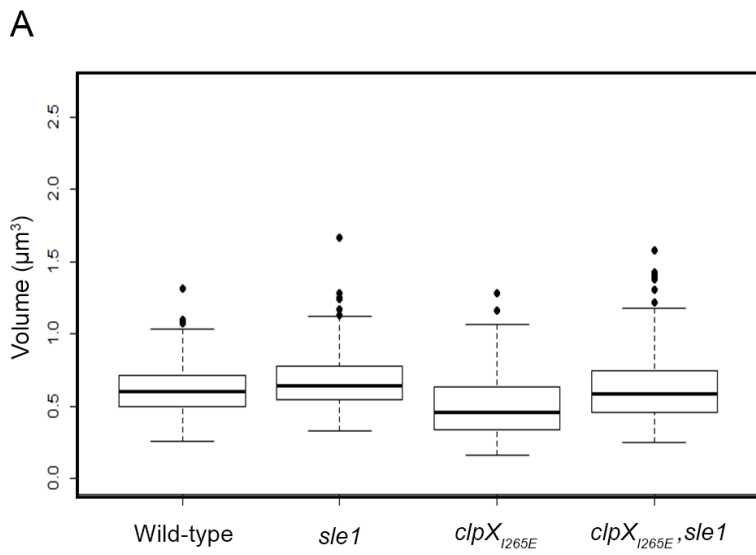

|                          | Wild-type | <i>sle1</i> | <i>clpX<sub>I265E</sub></i> | <i>clpX<sub>I265E</sub>, sle1</i> |
|--------------------------|-----------|-------------|-----------------------------|-----------------------------------|
| Mean ( $\mu\text{m}^3$ ) | 0.61      | 0.67        | 0.50                        | 0.62                              |
| SD                       | 0.15      | 0.17        | 0.20                        | 0.21                              |

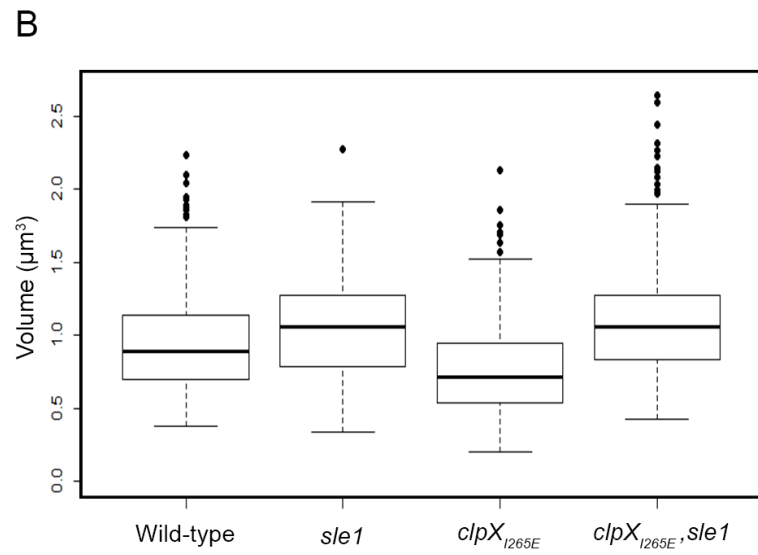

|                          | Wild-type | <i>sle1</i> | <i>clpX<sub>I265E</sub></i> | <i>clpX<sub>I265E</sub>, sle1</i> |
|--------------------------|-----------|-------------|-----------------------------|-----------------------------------|
| Mean ( $\mu\text{m}^3$ ) | 0.95      | 1.04        | 0.77                        | 1.08                              |
| SD                       | 0.32      | 0.31        | 0.32                        | 0.34                              |

Wild-type

*sle1*

*clpX*<sub>1265E</sub>

*clpX*<sub>1265E</sub> *sle1*

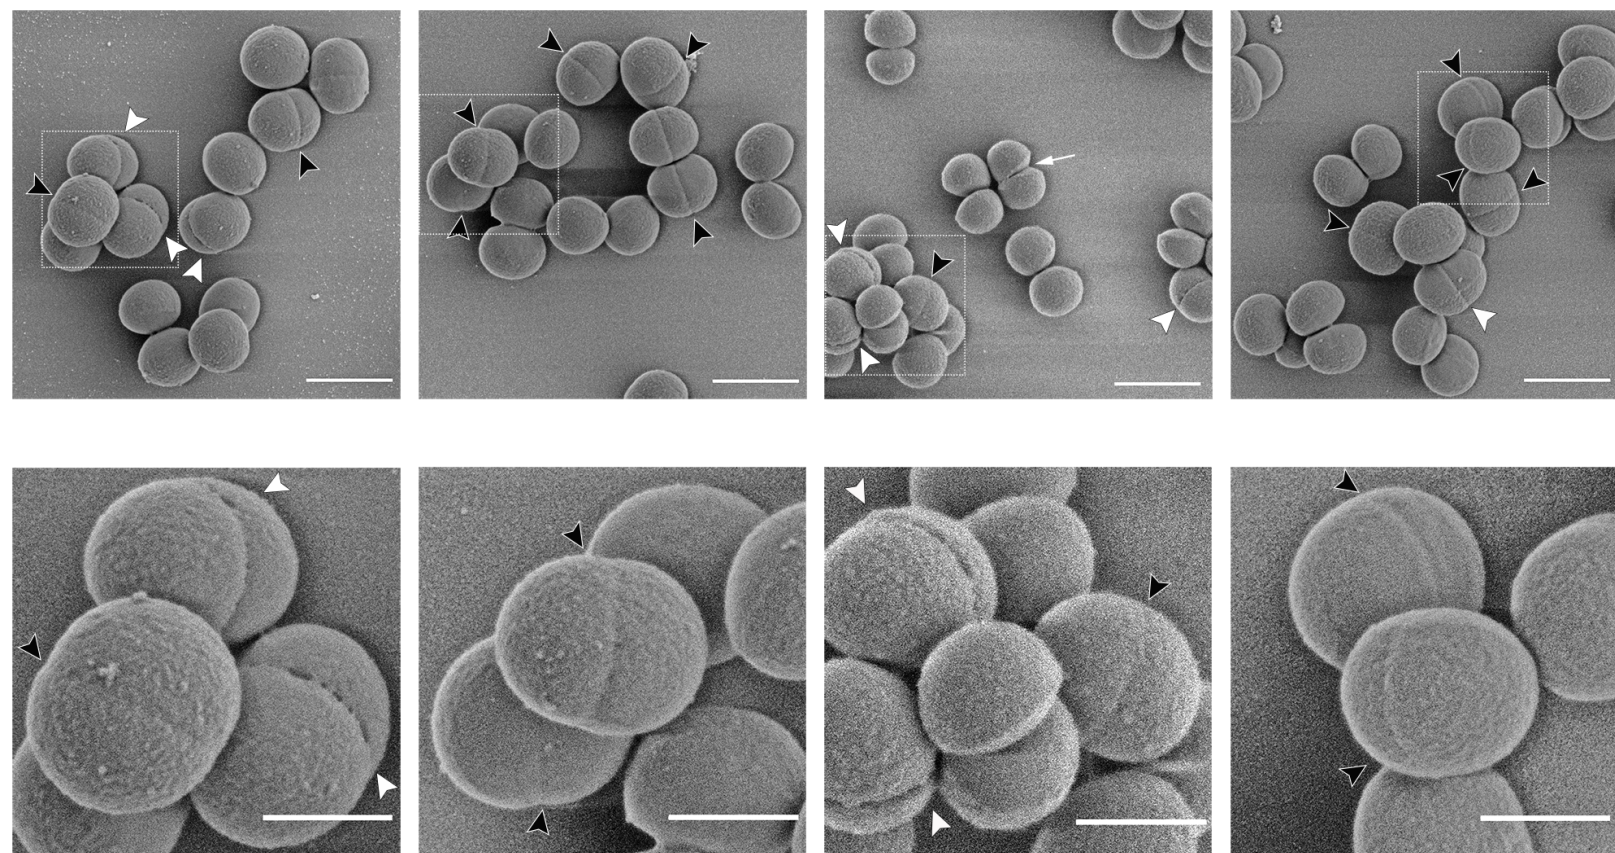

TSB

20 minutes - 1.25  $\mu\text{g ml}^{-1}$  Oxacillin

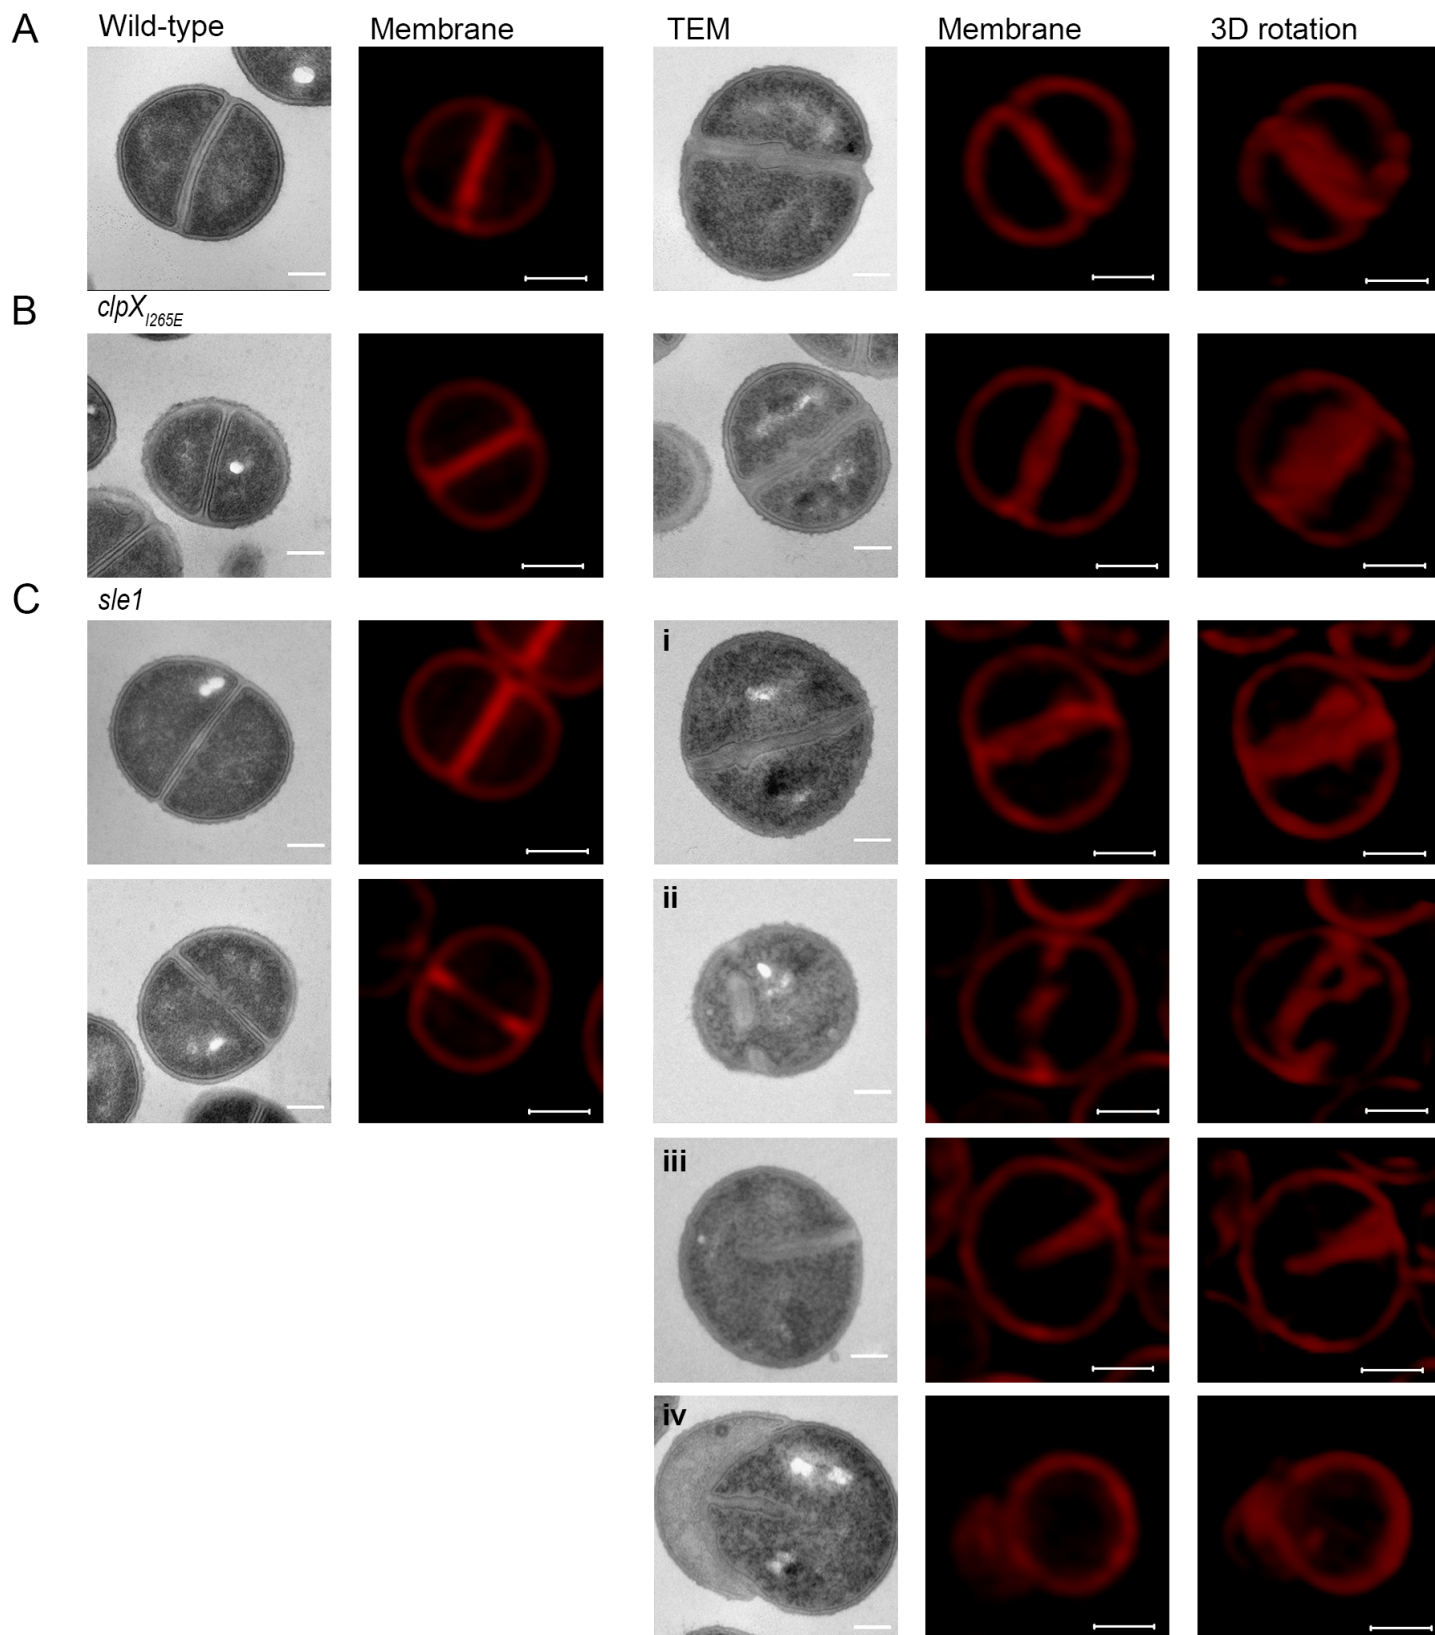



**A**

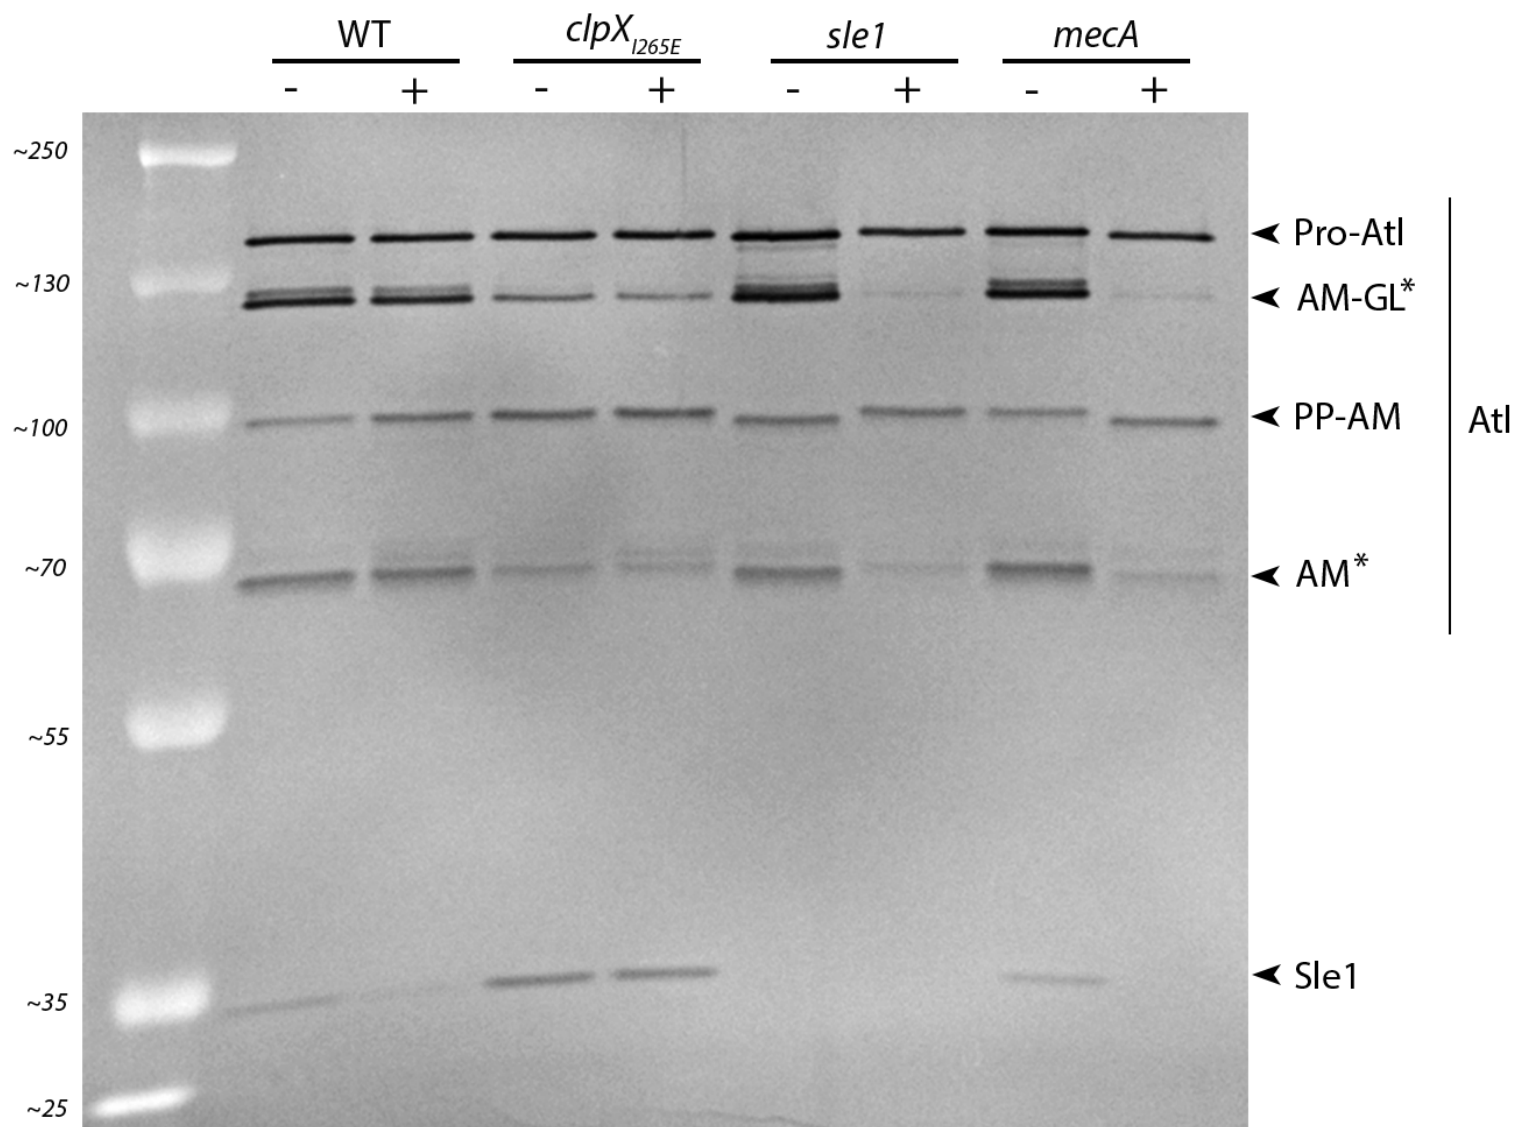

**B**

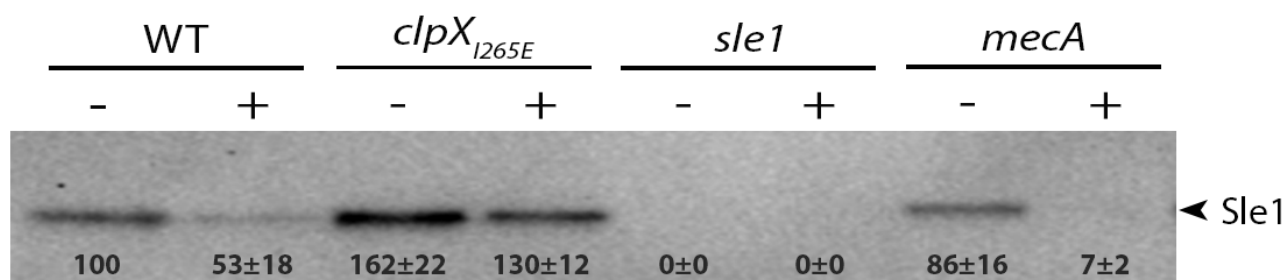

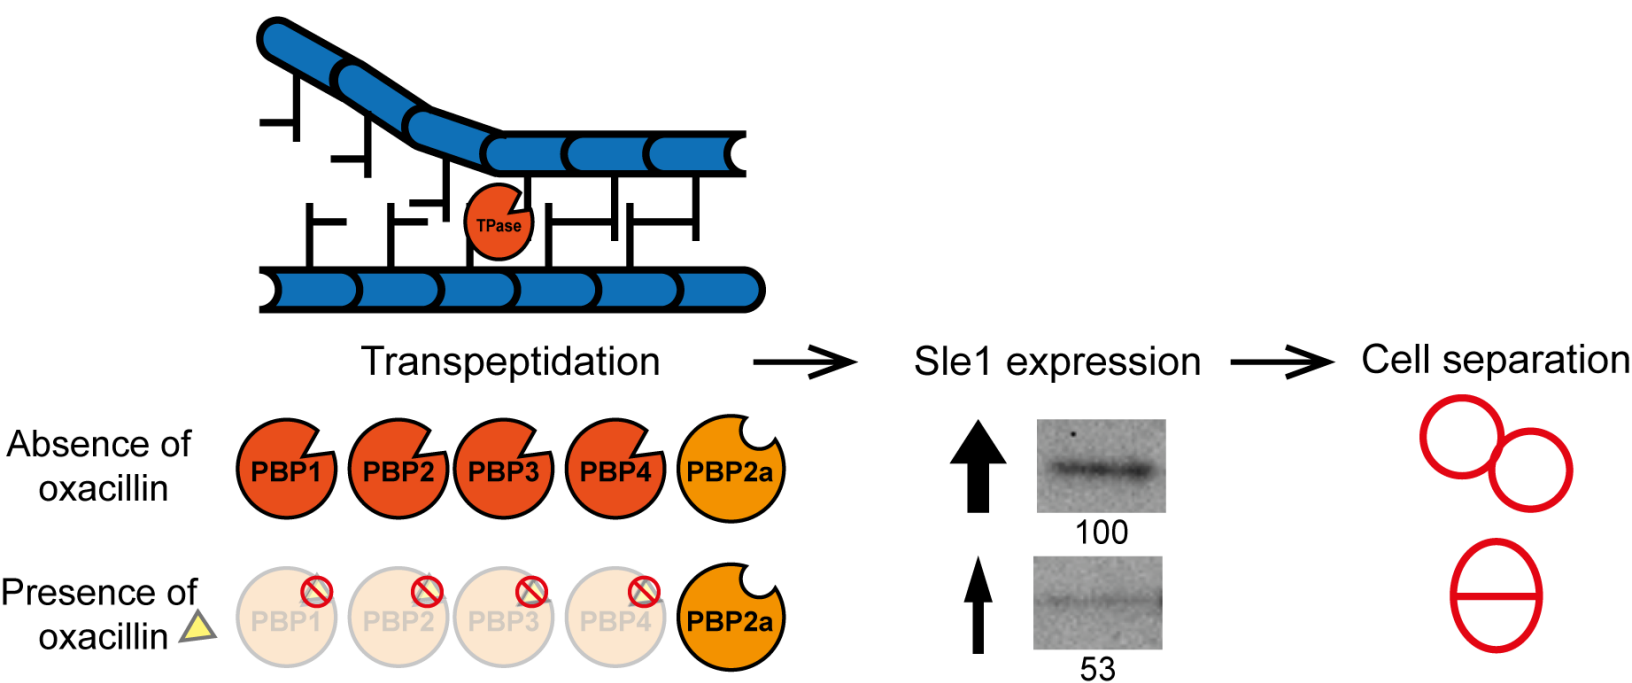

## Cefotaxime

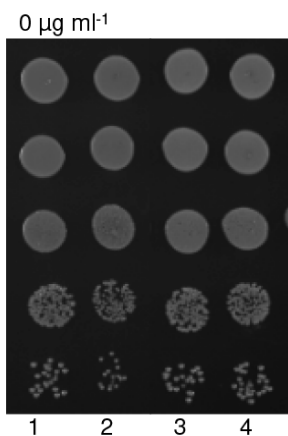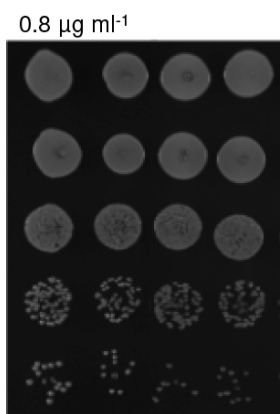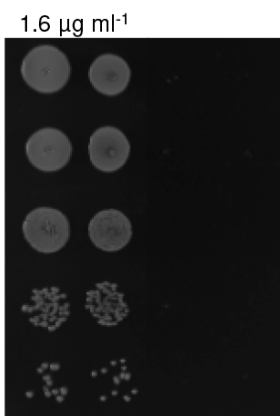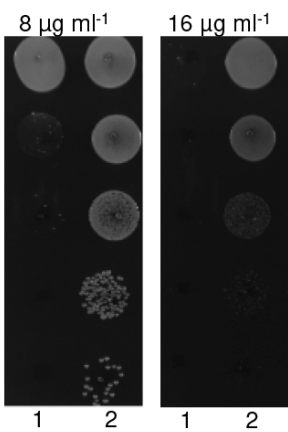

## Cefoxitin

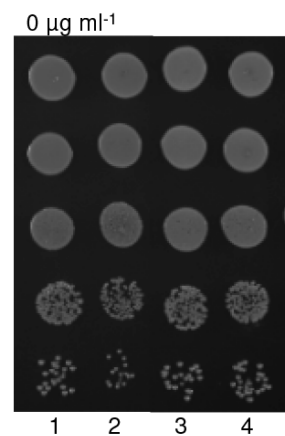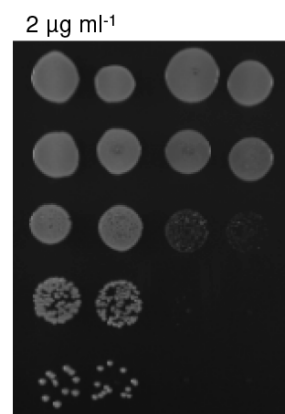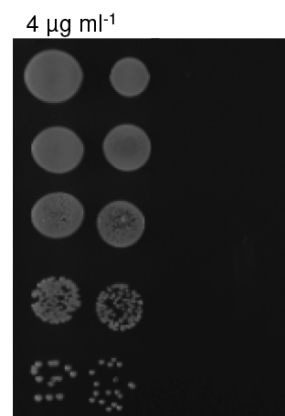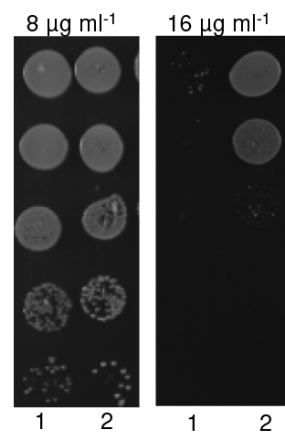

## Meropenem

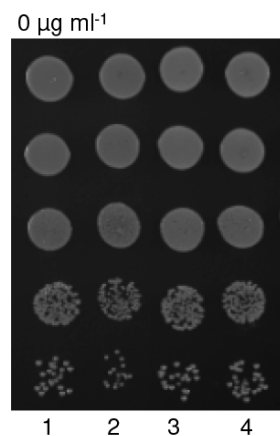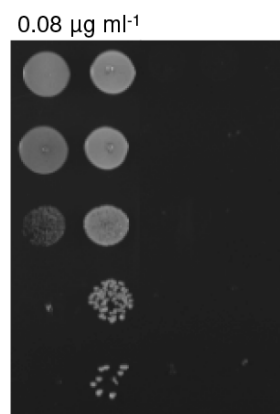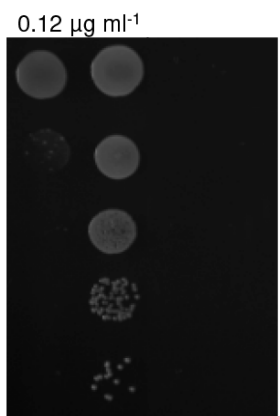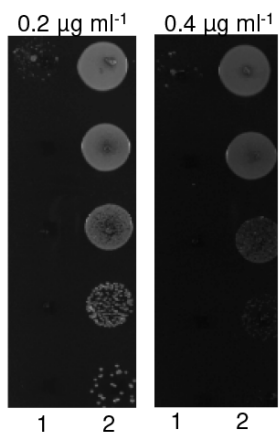

## Imipenem

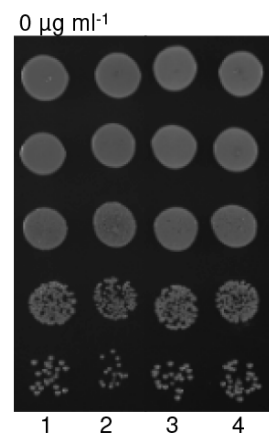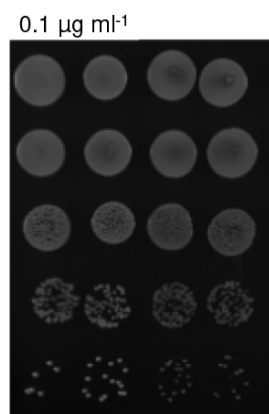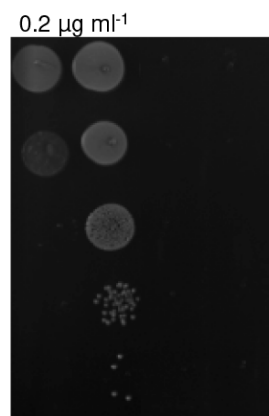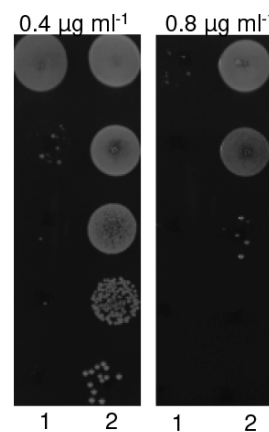

## Ceftriaxome

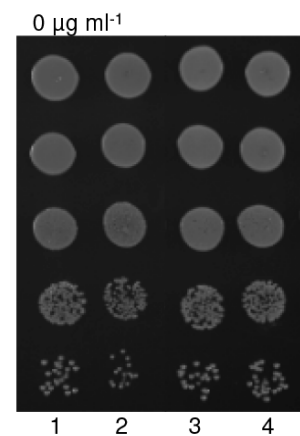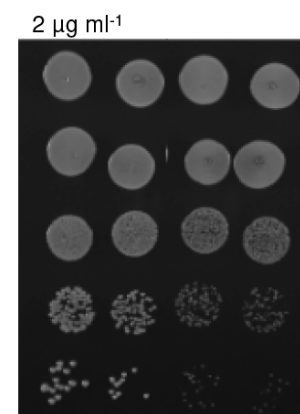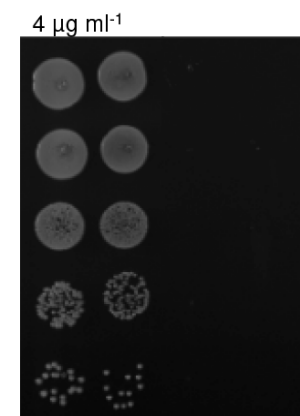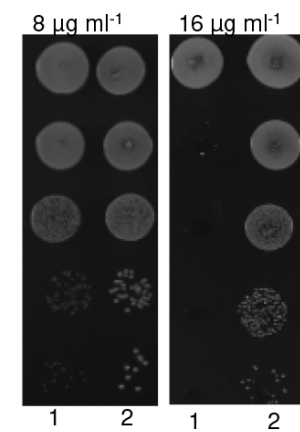



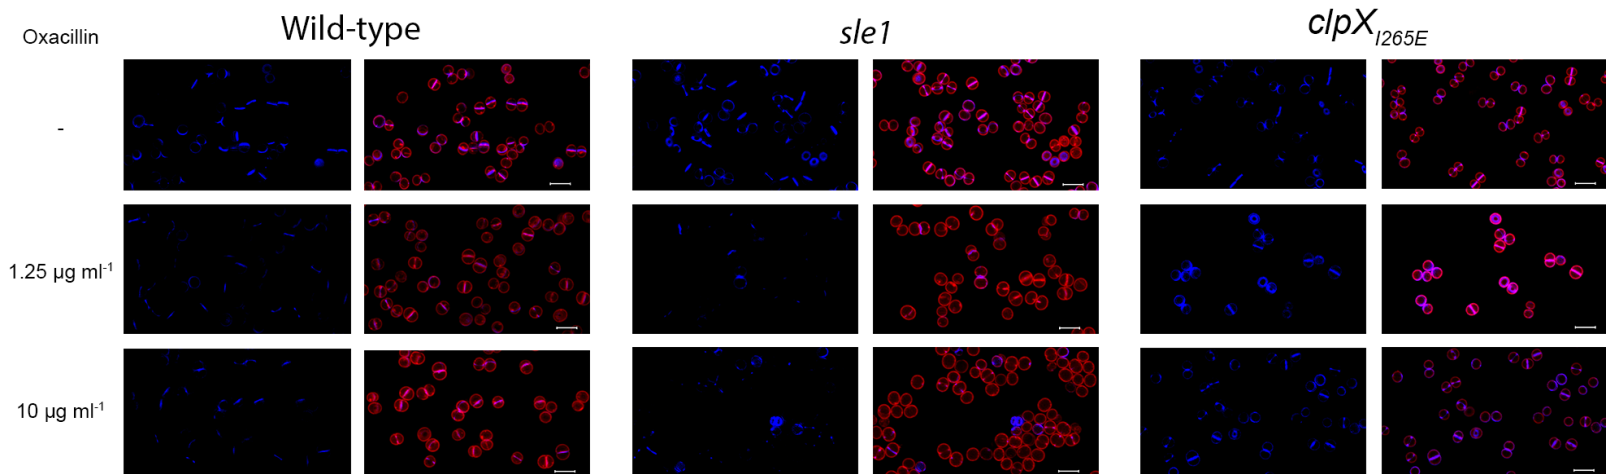

Wild-type

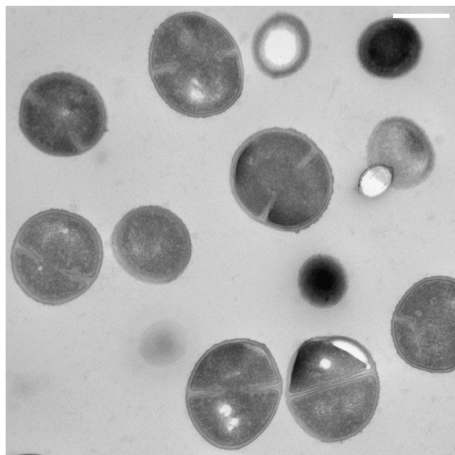

*sle1*

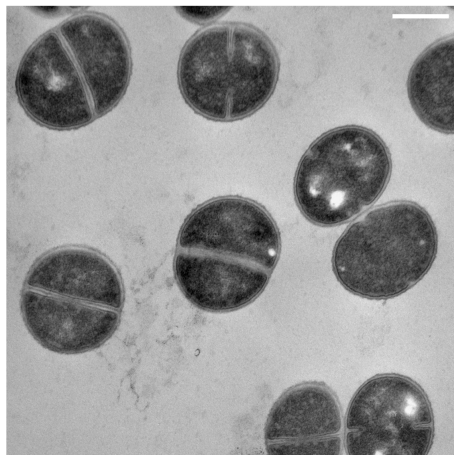

*clpX*<sub>1265E</sub>

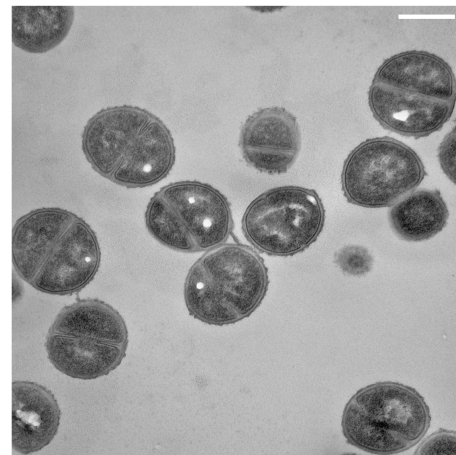

+

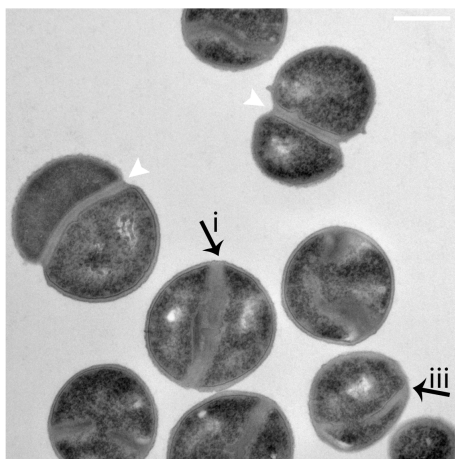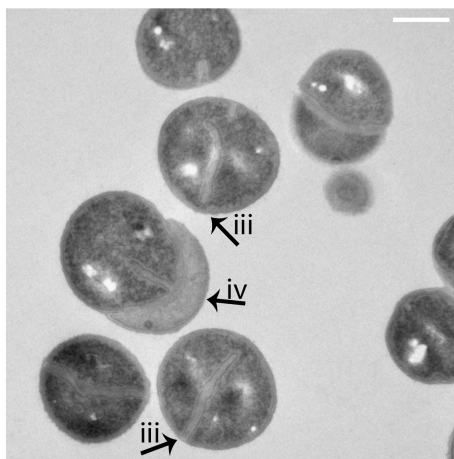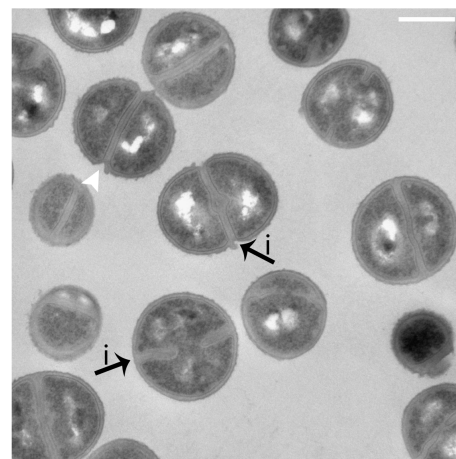

**A**

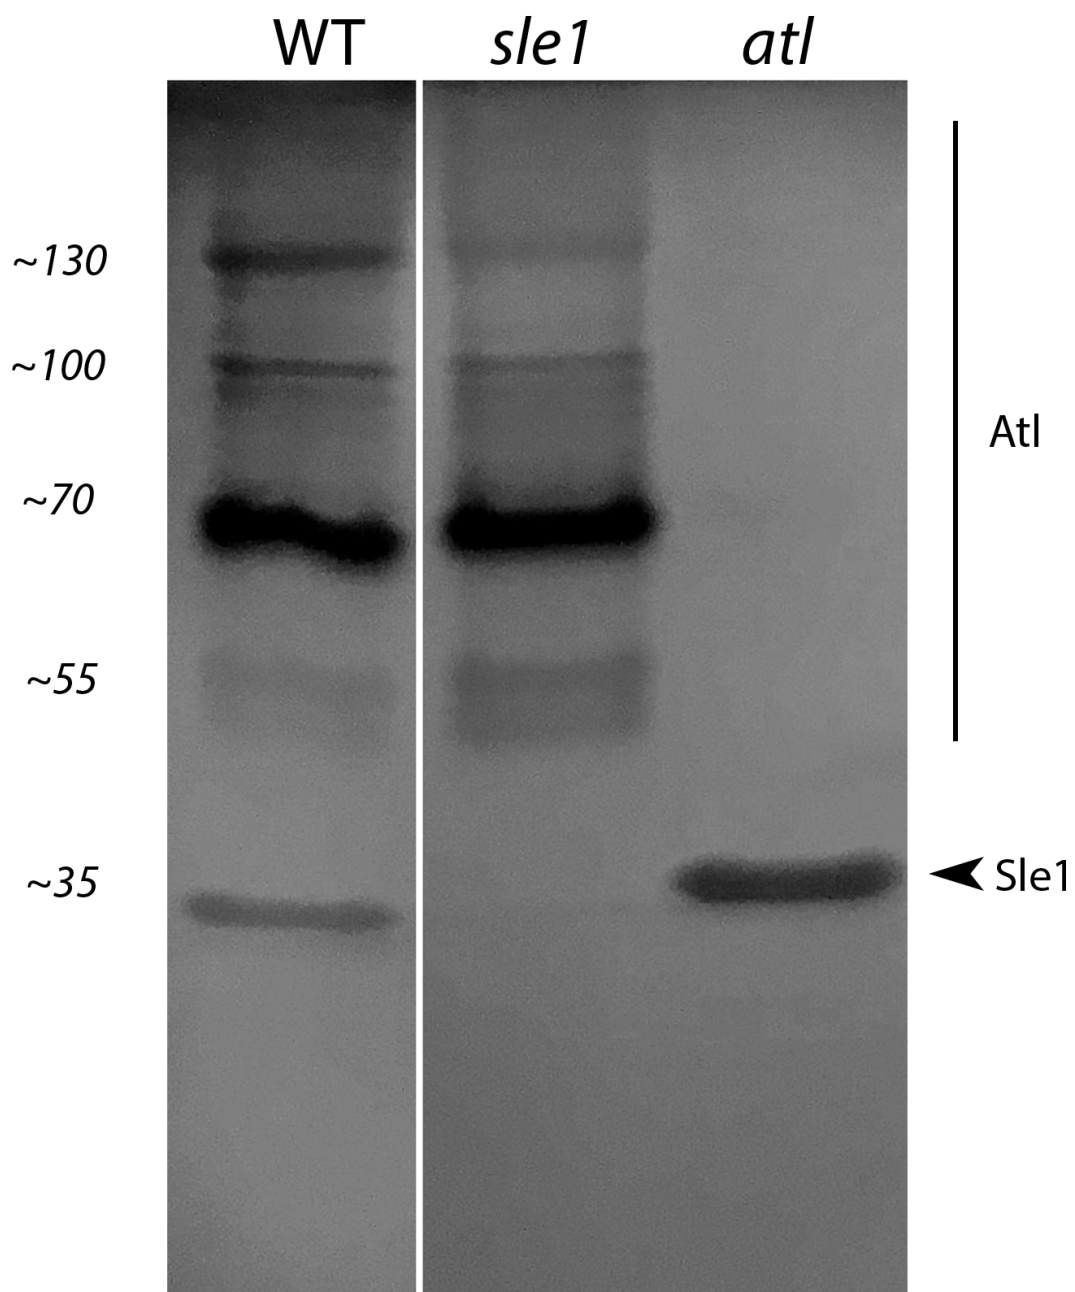

**B**

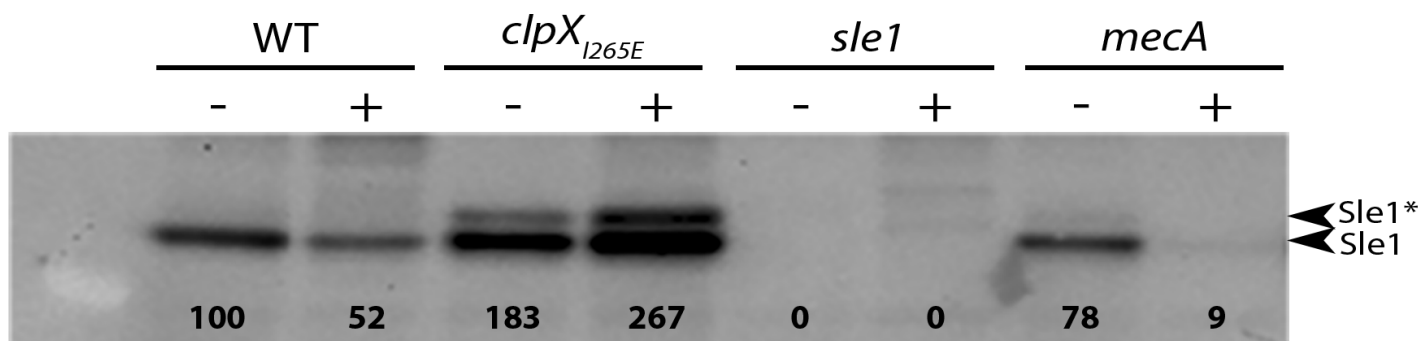

Source: http://biorxiv.org/content/10.1101/772616v1.full.pdf
